# Supplementary material for: Prevalence, nature and predictors of prescribing errors in mental health hospitals: a prospective multicentre study
Source: PubMed Central journal article supplement — BMJ Open. 2014 Oct 1;4(9):e006084. doi: 10.1136/bmjopen-2014-006084 (PMC4185335; doi:10.1136/bmjopen-2014-006084), 2014-10-01
Supplement: bmjopen-2014-006084.draft_revisions.pdf [file bmjopen-2014-006084.draft_revisions.pdf]

# BMJ Open

## Prevalence, nature and predictors of prescribing errors in mental health hospitals: a prospective multicentre study

|                                 |                                                                                                                                                                                                                                                                                                                                                                                                                                                                                                                                                                                   |
|---------------------------------|-----------------------------------------------------------------------------------------------------------------------------------------------------------------------------------------------------------------------------------------------------------------------------------------------------------------------------------------------------------------------------------------------------------------------------------------------------------------------------------------------------------------------------------------------------------------------------------|
| Journal:                        | <i>BMJ Open</i>                                                                                                                                                                                                                                                                                                                                                                                                                                                                                                                                                                   |
| Manuscript ID:                  | bmjopen-2014-006084                                                                                                                                                                                                                                                                                                                                                                                                                                                                                                                                                               |
| Article Type:                   | Research                                                                                                                                                                                                                                                                                                                                                                                                                                                                                                                                                                          |
| Date Submitted by the Author:   | 10-Jul-2014                                                                                                                                                                                                                                                                                                                                                                                                                                                                                                                                                                       |
| Complete List of Authors:       | Keers, Richard; University of Manchester, Centre for Pharmacoepidemiology and Drug Safety Research<br>Williams, Steve; UHSM, Pharmacy; University of Manchester<br>Vattakatuchery, Joe; 5 Borough's Partnership NHS Foundation Trust, Adult Services, Warrington<br>Brown, Petra; Manchester Mental Health and Social Care NHS Trust, Pharmacy<br>Miller, Joan; Greater Manchester West Mental Health NHS Foundation Trust, Pharmacy<br>Prescott, Lorraine; 5 Borough's Partnership NHS Foundation Trust, Medicines Management Team<br>Ashcroft, Darren; University of Manchester |
| <b>Primary Subject Heading</b>: | Health services research                                                                                                                                                                                                                                                                                                                                                                                                                                                                                                                                                          |
| Secondary Subject Heading:      | Mental health                                                                                                                                                                                                                                                                                                                                                                                                                                                                                                                                                                     |
| Keywords:                       | Clinical governance < HEALTH SERVICES ADMINISTRATION & MANAGEMENT, Quality in health care < HEALTH SERVICES ADMINISTRATION & MANAGEMENT, PSYCHIATRY                                                                                                                                                                                                                                                                                                                                                                                                                               |
|                                 |                                                                                                                                                                                                                                                                                                                                                                                                                                                                                                                                                                                   |

SCHOLARONE™  
Manuscripts

1  
2  
3 **Prevalence, nature and predictors of prescribing errors in mental health hospitals: a**  
4  
5 **prospective multicentre study**  
6  
7

8 **Running title:** Prescribing errors in mental health hospitals  
9

10  
11 Richard N Keers, Lecturer in Pharmacy Practice and Research Associate<sup>1,2</sup>  
12

13 Steven D Williams, Honorary Clinical Lecturer<sup>1</sup> and Consultant Pharmacist in Medicine and  
14  
15 Medication Safety<sup>3</sup>  
16

17 Joe J Vattakatuchery, Lead Consultant Psychiatrist<sup>4</sup> and Honorary Clinical Lecturer<sup>5</sup>  
18

19 Petra Brown, Chief Pharmacist<sup>6</sup>  
20

21 Joan Miller, Deputy Director of Pharmacy<sup>7</sup>  
22

23 Lorraine Prescott, Chief Pharmacist<sup>8</sup>  
24

25 Darren M Ashcroft, Professor of Pharmacoepidemiology<sup>1,2</sup>  
26  
27

28  
29  
30 <sup>1</sup> Centre for Pharmacoepidemiology and Drug Safety Research, Manchester Pharmacy School, Manchester  
31 Academic Health Sciences Centre (MAHSC), University of Manchester, Manchester, United Kingdom (UK)  
32

33 <sup>2</sup>NIHR Greater Manchester Primary Care Patient Safety Translational Research Centre, MAHSC, University of  
34 Manchester, Manchester, UK.  
35

36 <sup>3</sup>Pharmacy Department, University Hospital of South Manchester NHS Foundation Trust, MAHSC, Manchester  
37

38 <sup>4</sup>Adult Services Warrington, 5 Boroughs Partnership NHS Foundation Trust, Warrington, Cheshire, UK  
39

40 <sup>5</sup>Medical School, University of Liverpool, Liverpool, UK  
41

42 <sup>6</sup>Pharmacy Department, Manchester Mental Health and Social Care Trust, MAHSC, Manchester, UK  
43

44 <sup>7</sup>Pharmacy Department, Greater Manchester West Mental Health NHS Foundation Trust, Salford, UK  
45

46 <sup>8</sup>Medicines Management Team, 5 Boroughs Partnership NHS Foundation Trust, Warrington, Cheshire, UK  
47  
48

49 **Correspondence:** R N Keers Tel: (+44)161 275 2414, Fax: (+44)1612752416,  
50

51 [richard.keers@manchester.ac.uk](mailto:richard.keers@manchester.ac.uk)  
52

53 **Word count main text:** 3780 / **Abstract word count:** 278  
54

55 **Keywords:** Medication errors; psychiatry; mental health; hospitals  
56

57 **Number of tables:** 5 / **Number of figures:** 0  
58  
59  
60

## ABSTRACT

**Objective:** To determine the prevalence, nature and predictors of prescribing errors (PEs) in three mental health hospitals.

**Setting:** Inpatient units in three National Health Service (NHS) mental health hospitals in the North West of England.

**Participants:** Trained clinical pharmacists prospectively recorded the number of PEs in newly written or omitted prescription items screened during their routine work on 10 data collection days. A multidisciplinary panel reviewed PE data using established methods to confirm (a) the presence of a PE, (b) the type of PE and (c) whether errors were clinically relevant and likely to cause harm.

**Primary outcome measures:** Frequency, nature and predictors of PEs.

**Results:** Of 4427 screened prescription items, 281 were found to have one or more PEs (error rate 6.3% (95% CI 5.6–7.1%)). Multivariate analysis revealed that speciality trainees (OR 1.23 (1.01-1.51)) and staff grade psychiatrists (OR 1.50 (1.05-2.13)) were more likely to make PEs when compared to foundation year one doctors, and that speciality trainees and consultant psychiatrists were twice as likely to make clinically relevant PEs (OR 2.61 (2.11-3.22) and 2.03 (1.66-2.50) respectively). Prescription items screened during prescription chart rewrite (OR 0.52 (0.33-0.82)) or at discharge (OR 0.87 (0.79-0.97)) were less likely to be associated with PEs than items assessed during inpatient stay, although they were more likely to be associated with clinically relevant PEs (OR 2.27 (1.72-2.99) and 4.23 (3.68-4.87) respectively). Prescription items screened at hospital admission were five times more likely (OR 5.39 (2.72-10.69)) to be associated with clinically relevant errors than during patient stay.

1  
2  
3 **Conclusions:** Prescribing errors may be more common in mental health hospitals than  
4  
5 previously reported and important targets to minimise these errors have been identified.  
6  
7  
8  
9

#### 10 11 **STRENGTHS AND LIMITATIONS OF THIS STUDY** 12

- 13  
14 • Using standardised methods, this study has for the first time prospectively determined  
15 the prevalence, nature and predictors of prescribing errors across three mental health  
16 hospitals.  
17  
18  
19
  - 20  
21 • Important potential targets were identified for future research to minimise prescribing  
22 errors in this setting.  
23  
24  
25
  - 26  
27 • The prospective error identification method used and variability in the clinical  
28 practice of data collectors may have resulted in an underestimation of the prescribing  
29 error rate.  
30  
31  
32
- 33  
34  
35  
36  
37  
38  
39  
40  
41  
42  
43  
44  
45  
46  
47  
48  
49  
50  
51  
52  
53  
54  
55  
56  
57  
58  
59  
60

## INTRODUCTION

Medication errors (MEs) and their associated adverse drug events (ADEs) continue to pose significant challenges for healthcare systems worldwide.<sup>[1-3]</sup> Errors in drug prescribing and administration appear to be the most common MEs.<sup>[4-6]</sup> In general hospitals prescribing errors (PEs) are estimated to affect between 2% and 15% of medication orders<sup>[2,7-9]</sup> and are thought to arise from multiple, interacting causes.<sup>[8,10-12]</sup>

Despite much research activity attempting to understand the frequency, causes and preventive strategies for MEs in general hospital settings, mental health hospitals have been given much less attention.<sup>[2,13-15]</sup> Published studies of PEs (and/or related ADEs) originate from the United Kingdom (UK),<sup>[9,16-23]</sup> United States of America (USA)<sup>[24-27]</sup> and Denmark.<sup>[28]</sup> In common with reviews of general hospital studies,<sup>[2]</sup> differences in study methods, settings and definitions preclude synthesis of PE data from relevant studies to gain an overall measure of their impact.<sup>[13,15,29]</sup>

Not surprisingly, different ME/ADE identification methods influence the outcome rate.<sup>[2,14,30]</sup>

It is accepted that voluntary self-reporting methods such as incident reports grossly underestimate the numbers of MEs that occur when compared to chart review and other detection methods,<sup>[30,31]</sup> which may make subsequent error rates unrepresentative of the practice environment. A number of PE studies carried out in mental health utilised incident/self-reports<sup>[21,23]</sup> with others using retrospective medication chart review (with or without incident reports / case note review / direct observation).<sup>[16,17,24,25,28]</sup> Prospective identification of PEs in UK psychiatry has most commonly involved pharmacists checking prescription charts over different time periods,<sup>[9,18-20,22]</sup> yielding error rates of 2.2%<sup>[18]</sup> and 2.4%<sup>[22]</sup> of prescription items checked (two studies did not provide a denominator<sup>[19,20]</sup>) and

1  
2  
3 31.3% of whole prescriptions checked.<sup>[9]</sup> Between 42.1% and 65% of PEs are administered to  
4  
5 patients before correction by the pharmacist.<sup>[18,20,22]</sup>  
6  
7

8 To our knowledge, no studies have utilised prospective screening of only newly written  
9  
10 prescription items by pharmacists in psychiatry inpatients to find PEs, as seen in general  
11  
12 hospitals.<sup>[7,8]</sup> This design may reduce the possibility of including errors which have  
13  
14 previously been checked and corrected by healthcare staff prior to examination by data  
15  
16 collectors.<sup>[9,18,20,22]</sup> In addition, previous studies in psychiatry have not investigated the  
17  
18 differences in PE rates or severity between different prescribers and prescribing stages.<sup>[18,20,22]</sup>  
19  
20 This study aimed to determine the prevalence, nature and predictors of inpatient prescribing  
21  
22 errors in UK mental health settings.  
23  
24  
25  
26  
27  
28  
29  
30  
31  
32  
33  
34  
35  
36  
37  
38  
39  
40  
41  
42  
43  
44  
45  
46  
47  
48  
49  
50  
51  
52  
53  
54  
55  
56  
57  
58  
59  
60

## METHOD

### Settings

Three mental health NHS Trusts based in the North West of England took part in the study. Each provided a range of inpatient and community services. On weekdays, clinical pharmacists checked inpatient paper prescription charts written on admission, during patient stay, upon chart re-write (charts were rewritten by prescribers once administration records were full), on paper leave prescriptions and on paper discharge prescriptions. Medication lists were reconciled on admission predominantly by pharmacy teams using sources that included the patient, their General Practitioner (GP) records and any medication brought into hospital. One study site used an electronic prescription pro-forma at discharge. Medications were administered by registered nurses or by patients using self-administration. Pharmacist prescription chart review involved confirming the clarity, completeness and clinical appropriateness of each prescribed item, and occurred daily on some wards (e.g. acute adult units) but less frequently on others (e.g. long stay forensic units). Where necessary, patients' medical notes were accessed as part of the pharmacists' assessment of prescribing safety. All inpatient units visited by pharmacists on data collection days were included in the study. Outpatient prescriptions were excluded.

### Definitions

The definition of a PE used in this study has been used extensively in prescribing error research.<sup>[2,7-9,18,20,22]</sup> 'A clinically meaningful prescribing error occurs when, as a result of a prescribing decision or prescription-writing process, there is an unintentional significant reduction in the probability of treatment being timely and effective, or an increase in the risk of harm when compared with generally accepted practice.'<sup>[32]</sup> This definition was

1  
2  
3 accompanied by a list of situations that should be included and excluded as PEs. However, as  
4  
5 the mental health environment differs from typical hospital settings upon which this  
6  
7 definition was based, we extended its scope to include the following scenarios based on  
8  
9 earlier work:<sup>[18,20,22]</sup> (a) prescribing a drug without first registering a patient with the  
10  
11 appropriate monitoring service (e.g. Clozapine Patient Monitoring Service (CPMS)) and (b)  
12  
13 prescribing a drug to treat mental health illness without authorisation from a Mental Health  
14  
15 Act form (e.g. form T2/T3, Advance Decision).  
16  
17

### 18 19 **Data collection**

20  
21  
22 The process of recording inpatient prescribing errors was based on the UK EQUIP study.<sup>[7]</sup>  
23  
24 Clinical pharmacists employed at each site identified PEs for all newly prescribed/written or  
25  
26 omitted items as part of their routine clinical practice in this setting during a total of 10 data  
27  
28 collection days individually selected between January – April 2013. Omitted items were  
29  
30 identified after reconciliation on admission or after comparison with earlier inpatient  
31  
32 prescribing documentation and their inclusion in the denominator ensured that pharmacists  
33  
34 were able to determine whether items were omitted for a valid clinical reason before  
35  
36 recording them as a PE. One data collection day per week was purposively chosen to ensure  
37  
38 coverage of all weekdays at least once according to local capacity, with a complete day  
39  
40 including the period from 5pm on the previous day until 5pm on the assigned data collection  
41  
42 day. On Mondays, this period was extended to include prescriptions written from 5pm the  
43  
44 previous Friday throughout the weekend.  
45  
46  
47  
48

49  
50 Data on the number of newly prescribed or omitted items and the corresponding number of  
51  
52 errors were entered onto two standardised forms by pharmacists based on earlier work<sup>[7]</sup> and  
53  
54 underwent piloting at one participating site in December 2012. Newly prescribed orders  
55  
56 included once only and when required items. Completion of these forms was for research  
57  
58  
59  
60



1  
2  
3 purposes and was outside the pharmacists' normal duties, though time taken on this task was  
4 reported to be insignificant during pilot testing. For each prescribing error recorded,  
5  
6 pharmacists were asked to record patient information, prescriber grade, stage of patient stay,  
7  
8 a potential severity rating (including whether or not the error reached the patient) along with  
9  
10 details as to the nature of the PE. Each item checked could be associated with more than one  
11  
12 prescribing error.  
13  
14

15  
16  
17 Pharmacist study co-ordinators based at each site used the same materials to provide training  
18  
19 for participating pharmacists which also included question and answer sessions. A  
20  
21 standardised guidebook was made available to data collectors for use at any point during the  
22  
23 study and co-ordinators made regular contact with data collectors to answer any questions  
24  
25 raised.  
26  
27

### 28 29 **Error validation**

30  
31  
32 Validation of all recorded PEs was undertaken by a multidisciplinary panel which comprised  
33  
34 one mental health clinical pharmacist (RNK), one consultant pharmacist in medicine and  
35  
36 medication safety (SDW) and one consultant psychiatrist (JJV). The errors were reviewed  
37  
38 and consensus was reached on (a) whether a genuine prescribing error had occurred, (b) type  
39  
40 of error and (c) the potential severity of the error using established criteria.<sup>[7]</sup> PEs that were  
41  
42 rated as either potentially clinically significant, serious or life-threatening were considered  
43  
44 clinically relevant for patients.  
45  
46  
47

### 48 49 **Data analysis**

50  
51 Descriptive statistics were used to analyse frequency of error categories by prescriber grade  
52  
53 and prescribing stage, with additional investigations into the nature of PEs identified (route,  
54  
55 severity, type, drug class). Error rates were calculated as a percentage to measure the  
56  
57

1  
2  
3 prevalence of PEs by dividing the number of newly written or omitted prescription items by  
4  
5 the total number of these items screened and multiplying the answer by 100. Error rates were  
6  
7 presented with corresponding 95% confidence intervals (CI).  
8  
9

10 Logistic regression analyses were undertaken to examine (a) predictors of prescribing errors,  
11  
12 and (b) predictors of a clinically relevant error (potentially significant, serious or life-  
13  
14 threatening) compared to a minor error across different prescribers, prescribing stages, and  
15  
16 written vs. electronic prescribing. Analysis of potential error severity also involved  
17  
18 comparing errors occurring within the central nervous system class of medicines (which  
19  
20 includes all psychotropic medicines) versus all other medication classes,<sup>[33]</sup> and comparing  
21  
22 different subtypes of PEs that occurred. All logistic regression models were adjusted for  
23  
24 clustering at study site and results presented as adjusted odds ratios (OR) and 95%  
25  
26 Confidence Intervals (CI). All calculations were undertaken using STATA V12®, and  $p < 0.05$   
27  
28 was used to indicate statistical significance.  
29  
30  
31

### 32 33 **Ethics**

34  
35  
36 This study was granted ethical approval by the University of Manchester Research Ethics  
37  
38 Committee (12342) and approval was obtained by the Research and Development/Audit  
39  
40 Departments from each participating study site.  
41  
42  
43  
44  
45  
46  
47  
48  
49  
50  
51  
52  
53  
54  
55  
56  
57  
58  
59  
60

## RESULTS

During the study period 4427 newly written or omitted prescription items were assessed by study pharmacists across the three study sites. A total of 367 PEs were recorded, 79 of which were excluded during review by the expert panel. Good agreement was observed between panel members when reviewing errors, with the most common reason for exclusion at this stage being minor prescription writing incidents such as trivial spelling mistakes, missing information on prescriptions for use when required (e.g. no indication, no minimum dosage interval) or writing medication names without using capital letters.

After review by the expert panel, 281 newly prescribed or omitted items were found to be affected by 1 or more PEs, giving an error rate of 6.3% (95% CI 5.6-7.1%). Seven prescription items were affected by 2 PEs, giving a total of 288 detected errors. Table 1 displays PE rates by prescriber and stage of prescribing.

Orders prescribed on admission to hospital were associated with the highest PE rate (10.7% (95% CI 8.6-12.7%)) when compared to items prescribed during hospital stay (6.5% (5.3-7.8%)) or at discharge (6.5% (4.3-8.6%)). In contrast, items assessed on leave prescriptions (4.5% (1.9-7.0%)) and those that were re-written by prescribers (3.6% (2.6-4.6%)) had lower PE rates. Speciality trainees (general practitioner or psychiatry) were responsible for the majority of newly written or omitted items (52.8%) and had the highest PE rate (6.8% (5.8-7.8%)). Junior doctors generally had PE rates lower than their senior colleagues (Foundation Year (FY) one 5.1% (2.2-8.0%); FY two 4.9% (3.0-6.7%); staff grade 6.5% (4.2-8.7); consultant 5.8% (3.9-7.7%)).

**Table 1: Summary of prescribing errors by prescriber and prescribing stage**

| PRESCRIBER                  | DESCRIPTION                                | PRESCRIBING STAGE   |                     |                     |                     |                     |         | TOTAL                      |
|-----------------------------|--------------------------------------------|---------------------|---------------------|---------------------|---------------------|---------------------|---------|----------------------------|
|                             |                                            | On admission        | During stay         | Rewritten           | Leave               | Discharge           | Unknown |                            |
| <b>FY1*</b>                 | Items written/omitted                      | 28                  | 68                  | 46                  | 17                  | 57                  | 0       | <b>216</b>                 |
|                             | Errors found                               | 1                   | 3                   | 2                   | 0                   | 5                   | 0       | <b>11</b>                  |
|                             | % error rate<br>(95% confidence intervals) | 3.6%<br>(0.0-10.6%) | 4.4%<br>(0.0-9.3%)  | 4.3%<br>(0.0-10.3%) | 0%<br>(N/A)         | 8.8%<br>(1.4-16.2%) | -       | <b>5.1%<br/>(2.2-8.0%)</b> |
| <b>FY2</b>                  | Items written/omitted                      | 95                  | 124                 | 179                 | 79                  | 59                  | 0       | <b>536</b>                 |
|                             | Errors found                               | 5                   | 9                   | 5                   | 5                   | 2                   | 0       | <b>26</b>                  |
|                             | % error rate<br>(95% confidence intervals) | 5.3%<br>(0.7-9.8%)  | 7.3%<br>(2.7-11.8%) | 2.8%<br>(0.4-5.2%)  | 6.3%<br>(0.9-11.7%) | 3.4%<br>(0.0-8.0%)  | -       | <b>4.9%<br/>(3.0-6.7%)</b> |
| <b>Speciality Trainee**</b> | Items written/omitted                      | 582                 | 734                 | 636                 | 114                 | 270                 | 0       | <b>2336</b>                |
|                             | Errors found                               | 67                  | 50                  | 26                  | 3                   | 13                  | 0       | <b>159</b>                 |
|                             | % error rate<br>(95% confidence intervals) | 11.5%               | 6.8%                | 4.1%                | 2.6%                | 4.8%                | -       | <b>6.8%</b>                |

| PRESCRIBER                      | DESCRIPTION                             | PRESCRIBING STAGE  |                 |                 |                   |                   |         | TOTAL                  |
|---------------------------------|-----------------------------------------|--------------------|-----------------|-----------------|-------------------|-------------------|---------|------------------------|
|                                 |                                         | On admission       | During stay     | Rewritten       | Leave             | Discharge         | Unknown |                        |
|                                 | intervals)                              | (8.9-14.1%)        | (5.0-8.6%)      | (2.5-5.6%)      | (0.0-5.6%)        | (2.3-7.4%)        |         | (5.8-7.8%)             |
| <b>Staff Grade Psychiatrist</b> | Items written/omitted                   | 42                 | 148             | 203             | 18                | 38                | 16      | <b>465</b>             |
|                                 | Errors found                            | 10                 | 9               | 5               | 2                 | 4                 | 0       | <b>30</b>              |
|                                 | % error rate (95% confidence intervals) | 23.8% (10.8-36.9%) | 6.1% (2.2-9.9%) | 2.5% (0.3-4.6%) | 11.1% (0.0-26.1%) | 10.5% (0.6-20.4%) | 0%      | <b>6.5% (4.2-8.7%)</b> |
| <b>Consultant Psychiatrist</b>  | Items written/omitted                   | 30                 | 378             | 124             | 13                | 38                | 3       | <b>586</b>             |
|                                 | Errors found                            | 3                  | 23              | 4               | 0                 | 4                 | 0       | <b>34</b>              |
|                                 | % error rate (95% confidence intervals) | 10.0% (0.0-20.9%)  | 6.1% (3.7-8.5%) | 3.2% (0.1-6.3%) | 0%                | 10.5% (0.6-20.4%) | 0%      | <b>5.8% (3.9-7.7%)</b> |
| <b>Pharmacist Prescriber</b>    | Items written/omitted                   | 0                  | 3               | 0               | 0                 | 7                 | 0       | <b>10</b>              |
|                                 | Errors found                            | 0                  | 0               | 0               | 0                 | 0                 | 0       | <b>0</b>               |

| PRESCRIBER                | DESCRIPTION                                | PRESCRIBING STAGE   |                     |                    |                      |                      |           | TOTAL                       |
|---------------------------|--------------------------------------------|---------------------|---------------------|--------------------|----------------------|----------------------|-----------|-----------------------------|
|                           |                                            | On admission        | During stay         | Rewritten          | Leave                | Discharge            | Unknown   |                             |
|                           | % error rate<br>(95% confidence intervals) | -                   | 0%                  | -                  | -                    | 0%                   | -         | <b>0%</b>                   |
| <b>Nurse Prescriber</b>   | Items written/omitted                      | 0                   | 12                  | 0                  | 0                    | 0                    | 0         | <b>12</b>                   |
|                           | Errors found                               | 0                   | 0                   | 0                  | 0                    | 0                    | 0         | <b>0</b>                    |
|                           | % error rate<br>(95% confidence intervals) | -                   | 0%                  | -                  | -                    | -                    | -         | <b>0%</b>                   |
| <b>Unknown Prescriber</b> | Items written/omitted                      | 86                  | 63                  | 85                 | 6                    | 26                   | 0         | <b>266</b>                  |
|                           | Errors found                               | 6                   | 6                   | 4                  | 1                    | 4                    | 0         | <b>21</b>                   |
|                           | % error rate<br>(95% confidence intervals) | 7.0%<br>(1.6-12.4%) | 9.5%<br>(2.2-16.8%) | 4.7%<br>(0.2-9.2%) | 16.7%<br>(0.0-49.3%) | 15.4%<br>(1.2-29.5%) | -         | <b>7.9%<br/>(4.6-11.1%)</b> |
| <b>TOTAL</b>              | Items written/omitted                      | <b>863</b>          | <b>1530</b>         | <b>1273</b>        | <b>247</b>           | <b>495</b>           | <b>19</b> | <b>4427</b>                 |
|                           | Errors found                               | <b>92</b>           | <b>100</b>          | <b>46</b>          | <b>11</b>            | <b>32</b>            | <b>0</b>  | <b>281</b>                  |

| PRESCRIBER | DESCRIPTION                                | PRESCRIBING STAGE                  |                                  |                                  |                                  |                                  |           | TOTAL                            |
|------------|--------------------------------------------|------------------------------------|----------------------------------|----------------------------------|----------------------------------|----------------------------------|-----------|----------------------------------|
|            |                                            | On admission                       | During stay                      | Rewritten                        | Leave                            | Discharge                        | Unknown   |                                  |
|            | % error rate<br>(95% confidence intervals) | <b>10.7%</b><br><b>(8.6-12.7%)</b> | <b>6.5%</b><br><b>(5.3-7.8%)</b> | <b>3.6%</b><br><b>(2.6-4.6%)</b> | <b>4.5%</b><br><b>(1.9-7.0%)</b> | <b>6.5%</b><br><b>(4.3-8.6%)</b> | <b>0%</b> | <b>6.3%</b><br><b>(5.6-7.1%)</b> |

\* The Foundation Year (FY) programme corresponds to the first two years of medical training for junior doctors after completion of their undergraduate degree, and is similar to internships or residencies in other countries.

\*\* Speciality trainees include General Practitioner trainee (GPST1-3) and psychiatry trainee (CT1-2 and ST4-6) medical grades; FY = Foundation Year

### Nature of PEs identified

The vast majority of identified PEs were associated with the oral route of administration (n=216, 75%) and medicines belonging to the central nervous system class (n=165, 57.3%).

The most common types of PEs were medicines omitted on admission to hospital (n=36, 12.5%), followed by administration times/frequencies that were incorrect or missing (n=33, 11.5%), missing strengths or doses (n=30, 10.4%) and prescribing incorrect drug formulations (n=26, 9.0%). Other common PE subtypes included failing to sign a prescription (n=24), incorrect or missing start dates for prescriptions (n=21) and under-dosing (n=20). Table 2 shows the frequency of all PE subtypes. After review by the multidisciplinary panel, 162 (56.3%) PEs were considered clinically relevant for patients. These findings are summarised in Table 3 and a summary of all potentially serious and life-threatening errors is provided in Table 4.

Half of the 20 potentially serious or life threatening PEs involved central nervous system medicines, with the remaining 10 including cardiovascular system (n=5), endocrine system (n=4, all insulin) and anti-infective therapies (n=1). These error types occurred more commonly in female patients (n=14) and most frequently involved clinical contraindications (n=6), omission on admission (n=5) and missing strengths or doses (n=4); 3 female patients accumulated 11 of these errors, with one affected by 4 clinical contraindications, another with 4 with missing strengths/doses and the final patient with 3 drugs omitted on admission. In contrast, 25% of all potentially serious or life-threatening PEs involved injectable administration routes (subcutaneous route (n=4) or intramuscular (n=1) compared with total of 20/288 (6.9%) overall).



**Table 2: Types of prescribing errors**

| Type of prescribing error         | Subtypes                                           | Frequency (%) |
|-----------------------------------|----------------------------------------------------|---------------|
| <b>Need for drug</b>              | Omission on admission                              | 36 (12.5)     |
|                                   | Omission of discharge/leave prescription           | 14 (4.9)      |
|                                   | Duplication                                        | 13 (4.5)      |
|                                   | Continuation for longer than needed                | 10 (3.5)      |
|                                   | Omission on rewritten prescription                 | 3 (1.0)       |
|                                   | Drug not prescribed but indicated                  | 1 (0.3)       |
|                                   | No indication                                      | 1 (0.3)       |
|                                   | Premature discontinuation                          | 0             |
| <b>Selection of specific drug</b> | Clinical contra-indication                         | 9 (3.1)       |
|                                   | Unintentional prescription of drug                 | 2 (0.7)       |
|                                   | Continuation after adverse drug reaction           | 0             |
|                                   | Drug interaction                                   | 0             |
|                                   | Significant allergy                                | 0             |
| <b>Select dosage regimen</b>      | Underdose                                          | 20 (6.9)      |
|                                   | Overdose                                           | 12 (4.2)      |
|                                   | No maximum dose                                    | 5 (1.7)       |
|                                   | Drug interaction not taken into account            | 1 (0.3)       |
|                                   | Dose / rate mismatch                               | 0             |
|                                   | No dosage alteration after levels out of range     | 0             |
|                                   | Daily dose divided incorrectly                     | 0             |
| <b>Administration of drug</b>     | Administration times/frequencies incorrect/missing | 34 (11.8)     |
|                                   | Incorrect formulation                              | 26 (9.0)      |
|                                   | Start date incorrect/missing                       | 21 (7.3)      |
|                                   | Intramuscular instructions incorrect/missing       | 0             |
|                                   | Incorrect route                                    | 0             |
| <b>Provide drug product</b>       | Strength/dose missing                              | 30 (10.4)     |
|                                   | No signature                                       | 24 (8.3)      |
|                                   | Product/formulation not specified                  | 17 (5.9)      |

| Type of prescribing error | Subtypes                                                                     | Frequency (%) |
|---------------------------|------------------------------------------------------------------------------|---------------|
|                           | Prescribed medication not in accordance with Mental Health Act documentation | 4 (1.4)       |
|                           | Route missing                                                                | 3 (1.0)       |
|                           | Controlled drug requirements incorrect/missing                               | 1 (0.3)       |
|                           | Prescription initiated before registration with monitoring service           | 1 (0.3)       |

---

For peer review only

**Table 3: Severity ratings for identified PEs following multidisciplinary review**

| Potential severity criteria            |                  | Examples                                                                                                                                                                                                                                                        | Frequency (%) |
|----------------------------------------|------------------|-----------------------------------------------------------------------------------------------------------------------------------------------------------------------------------------------------------------------------------------------------------------|---------------|
| Not clinically relevant                | Minor            | Prescription not signed.<br>No start date on prescription.                                                                                                                                                                                                      | 126 (43.8)    |
|                                        | Significant      | The dose of the drug is too low for a patient with the condition being treated.<br>The wrong route of administration for the condition being treated is ordered e.g. intramuscular depot is prescribed for subcutaneous administration.                         | 142 (49.3)    |
| Clinically relevant prescribing errors | Serious          | The dose of the drug would result in serum drug levels in the toxic range, e.g. lithium levels 1-2 mmol/L.<br>The drug orders could exacerbate the patient's condition, e.g. drug-drug interaction or drug-disease interaction.                                 | 19 (6.6)      |
|                                        | Life-threatening | The drug prescribed has a high potential to cause a life threatening adverse reaction, such as anaphylaxis, in light of the patient's medical history.<br>The dose of a potentially life-saving drug is too low for a patient having the disease being treated. | 1 (0.3)       |

**Table 4: Descriptions of potentially severe and life-threatening prescribing errors**

| Severity                     | Patient age | Patient sex | Medication               | Daily dose (intended) | Indication           | Route of administration | Error description                                                                                                                                                                                                                                                                                    |
|------------------------------|-------------|-------------|--------------------------|-----------------------|----------------------|-------------------------|------------------------------------------------------------------------------------------------------------------------------------------------------------------------------------------------------------------------------------------------------------------------------------------------------|
| Potentially life threatening | 46          | Male        | Zuclopenthixol Decanoate | 300mg weekly          | Schizophrenia        | Intramuscular           | Clinical Contraindication:<br>Patient prescribed this medication after previous prolonged QTc whilst taking olanzapine (no QTc values provided). After olanzapine stopped and zuclopenthixol started, no further ECG taken despite receiving two doses of depot (one of which was an increased dose) |
| Potentially severe           | 76          | Female      | Moxonidine               | 400 micrograms        | Hypertension         | Oral                    | Clinical contraindication:<br>Medication continued on rewritten prescription despite very low blood pressure recorded.                                                                                                                                                                               |
|                              |             |             | Bisoprolol               | 5mg                   | Hypertension         | Oral                    | As above – same patient                                                                                                                                                                                                                                                                              |
|                              |             |             | Lisinopril               | 10mg                  | Hypertension         | Oral                    | As above – same patient                                                                                                                                                                                                                                                                              |
|                              |             |             | Doxazosin                | 16mg                  | Hypertension         | Oral                    | As above – same patient                                                                                                                                                                                                                                                                              |
| Potentially severe           | 26          | Female      | Quetiapine               | 450mg                 | Personality disorder | Oral                    | Omission on admission:<br>Medicine not prescribed upon inpatient admission                                                                                                                                                                                                                           |
|                              |             |             | Diazepam                 | 15mg                  | Personality disorder | Oral                    | As above – same patient – doses missed                                                                                                                                                                                                                                                               |
|                              |             |             | Mirtazapine              | 45mg                  | Personality disorder | Oral                    | As above – same patient – doses missed                                                                                                                                                                                                                                                               |
| Potentially severe           | 48          | Female      | Novorapid insulin        | 6 units AM            | Diabetes             | Subcutaneous            | Dose/strength missing:<br>Insulin dose prescribed as ‘U’ instead of ‘Units’ which could have been mistaken for 0 i.e. 10 fold error                                                                                                                                                                  |

| Severity           | Patient age | Patient sex | Medication        | Daily dose (intended) | Indication                         | Route of administration | Error description                                                                                   |
|--------------------|-------------|-------------|-------------------|-----------------------|------------------------------------|-------------------------|-----------------------------------------------------------------------------------------------------|
|                    |             |             | Novorapid insulin | 4 units PM            | Diabetes                           | Subcutaneous            | As above – same patient                                                                             |
|                    |             |             | Novorapid insulin | 6 units PM            | Diabetes                           | Subcutaneous            | As above – same patient                                                                             |
|                    |             |             | Novorapid insulin | 4 units PRN           | Diabetes                           | Subcutaneous            | As above – same patient                                                                             |
| Potentially severe | 78          | Female      | Haloperidol       | 4mg                   | Psychotic depression               | Oral                    | Under-dose:<br>Dose prescribed on admission as 500 micrograms twice daily – only 25% of normal dose |
| Potentially severe | 32          | Female      | Sodium valproate  | 500mg                 | Epilepsy                           | Oral                    | Omission on admission:<br>Medication not prescribed on admission – dose missed                      |
| Potentially severe | 32          | Male        | Enalapril         | 20mg                  | Hypertension                       | Oral                    | Overdose:<br>Prescribed as 200mg daily on admission – 10 times overdose                             |
| Potentially severe | Unknown     | Male        | Co-trimoxazole    | 960mg                 | Pneumocystis pneumonia prophylaxis | Oral                    | Omission on admission:<br>Failure to prescribe on admission to hospital                             |
| Potentially severe | 79          | Male        | Risperidone       | 3mg                   | Psychosis                          | Oral                    | Duplication:<br>Dose increased from 1mg twice daily to 1.5mg twice                                  |

1  
2  
3  
4  
5  
6  
7  
8  
9  
10  
11  
12  
13  
14  
15  
16  
17  
18  
19  
20  
21  
22  
23  
24  
25  
26  
27  
28  
29  
30  
31  
32  
33  
34  
35  
36  
37  
38  
39  
40  
41  
42  
43  
44  
45  
46  
47  
48  
49

| Severity           | Patient age | Patient sex | Medication          | Daily dose (intended) | Indication | Route of administration | Error description                                                                                                                        |
|--------------------|-------------|-------------|---------------------|-----------------------|------------|-------------------------|------------------------------------------------------------------------------------------------------------------------------------------|
|                    |             |             |                     |                       |            |                         | daily, but old entry not cancelled.                                                                                                      |
| Potentially severe | 44          | Male        | Citalopram          | 30mg                  | Depression | Oral                    | Omission on discharge/leave prescription:<br>Omitted from discharge prescription                                                         |
| Potentially severe | Unknown     | Female      | Clozapine           | Titration             | Psychosis  | Oral                    | Clinical contra-indication: despite efforts to slow pace of clozapine dose escalation (due to tachycardia), dose increased by 50mg daily |
| Potentially severe | 34          | Male        | Sodium valproate MR | 1700mg                | Siezuers   | Oral                    | Under dose:<br>On admission, missed off 700mg morning dose                                                                               |

review only

### Predictors of PEs

Multivariate logistic regression analysis found that specialist trainee registrars (OR 1.23, 95% CI 1.01-1.51) and staff grade psychiatrists (OR 1.50 (1.05-2.13)) were more likely to make PEs than more junior foundation year 1 doctors (FY1) when controlling for prescribing stage, electronic prescriptions and when clustered for study site (as shown in Table 5).

When compared to items written or omitted during the patients stay, prescribers were less likely to make PEs when medication charts were rewritten or when patients were discharged home (OR 0.52 (0.33-0.82) and 0.87 (0.79-0.97) respectively). Newly written or omitted items on admission showed no differences in risk of PEs (OR 1.81 (0.51-6.37)) nor did items written or omitted for patient leave (OR 0.66 (0.39-1.11)) when compared to those screened during patient stay. No difference in risk of PE was observed when electronic prescriptions were compared to handwritten counterparts (OR 1.30 (0.72-2.35)).

### Predictors of clinically relevant PEs

As shown in Table 5, multivariate logistic regression analysis revealed that more experienced medical staff were more likely to make a clinically relevant PE than their junior counterparts (FY1), with speciality trainee registrars (General Practitioner or psychiatry) and consultant psychiatrists being twice as likely to do so (OR 2.61 (2.11-3.22) and 2.03 (1.66-2.50) respectively).

Patient admission and discharge were associated with a significantly increased risk of making a potentially clinically relevant PE when compared with during stay (OR 5.39 (2.72-10.69) and 4.23 (3.68-4.87) respectively), with the process of rewriting prescriptions also at significantly higher risk (OR 2.27 (1.72-2.99)). No difference in risk was observed when leave prescriptions were compared to those written during patient stay.

1  
2  
3 When compared against those errors associated with the ‘need for drug’ PE subcategory, the  
4  
5 groups ‘select dosage regimen’, ‘administration of drug’ and ‘provide drug product’ were  
6  
7 associated with a lower risk of potentially clinically relevant PEs (OR 0.44 (0.20-0.97), 0.17  
8  
9 (0.09-0.32), 0.04 (0.02-0.12) respectively). The latter two groups in particular were  
10  
11 associated with much lower risks; PE types included in these groups were mostly clerical in  
12  
13 origin (e.g., missing prescriber signature, see Table 2).  
14  
15

16  
17 Neither electronic prescriptions (OR 0.92 (0.38-2.22)) nor the central nervous system  
18  
19 medication class (OR 0.71 (0.34-1.49)) were associated with an increased likelihood of  
20  
21 clinically relevant PEs when compared to minor errors.  
22  
23  
24  
25  
26  
27  
28  
29  
30  
31  
32  
33  
34  
35  
36  
37  
38  
39  
40  
41  
42  
43  
44  
45  
46  
47  
48  
49  
50  
51  
52  
53  
54  
55  
56  
57  
58  
59  
60



**Table 5: Predictors of (a) error likelihood and (b) potential error severity: multivariate logistic models**

| FACTOR                              |                            | ODDS OF PRESCRIBING ERROR COMPARED TO NO ERROR |                    | ODDS OF CLINICALLY RELEVANT PRESCRIBING ERROR RATHER THAN A MINOR ERROR* |                     |
|-------------------------------------|----------------------------|------------------------------------------------|--------------------|--------------------------------------------------------------------------|---------------------|
|                                     |                            | Odds ratio (OR)                                | 95% CI             | Odds ratio (OR)                                                          | 95% CI              |
| Prescriber                          | FY1                        | Reference                                      |                    | Reference                                                                |                     |
|                                     | FY2                        | 0.96                                           | 0.84 – 1.11        | 1.83                                                                     | 0.77 – 4.38         |
|                                     | Speciality Trainee **      | <b>1.23</b>                                    | <b>1.01 – 1.51</b> | <b>2.61</b>                                                              | <b>2.11 – 3.22</b>  |
|                                     | Staff Grade Psychiatrist   | <b>1.50</b>                                    | <b>1.05 – 2.13</b> | 2.88                                                                     | 0.70 – 11.83        |
|                                     | Consultant Psychiatrist    | 1.18                                           | 0.71 – 1.95        | <b>2.03</b>                                                              | <b>1.66 – 2.50</b>  |
| Prescribing stage                   | During stay                | Reference                                      |                    | Reference                                                                |                     |
|                                     | Admission                  | 1.81                                           | 0.51 – 6.37        | <b>5.39</b>                                                              | <b>2.72 – 10.69</b> |
|                                     | Re-written item            | <b>0.52</b>                                    | <b>0.33 – 0.82</b> | <b>2.27</b>                                                              | <b>1.72 – 2.99</b>  |
|                                     | Leave                      | 0.66                                           | 0.39 – 1.11        | 2.57                                                                     | 0.74 – 8.95         |
|                                     | Discharge                  | <b>0.87</b>                                    | <b>0.79 – 0.97</b> | <b>4.23</b>                                                              | <b>3.68 – 4.87</b>  |
| Electronic item                     | No                         | Reference                                      |                    | Reference                                                                |                     |
|                                     | Yes                        | 1.30                                           | 0.72 – 2.35        | 0.92                                                                     | 0.38 – 2.22         |
| Medication class †                  | All others                 | -                                              | -                  | Reference                                                                |                     |
|                                     | Central Nervous System     | -                                              | -                  | 0.71                                                                     | 0.34 – 1.49         |
| Prescribing error subcategories *** | Need for drug              | -                                              | -                  | Reference                                                                |                     |
|                                     | Selection of specific drug | -                                              | -                  | 2.36                                                                     | 0.23 – 24.48        |
|                                     | Select dosage regimen      | -                                              | -                  | <b>0.44</b>                                                              | <b>0.20 – 0.97</b>  |
|                                     | Administration of drug     | -                                              | -                  | <b>0.17</b>                                                              | <b>0.09 – 0.32</b>  |
|                                     | Provide drug product       | -                                              | -                  | <b>0.04</b>                                                              | <b>0.02 – 0.12</b>  |
| Pseudo R squared values             |                            | <b>0.02</b>                                    |                    | <b>0.28</b>                                                              |                     |

| FACTOR | ODDS OF PRESCRIBING ERROR COMPARED TO NO ERROR |        | ODDS OF CLINICALLY RELEVANT PRESCRIBING ERROR RATHER THAN A MINOR ERROR* |        |
|--------|------------------------------------------------|--------|--------------------------------------------------------------------------|--------|
|        | Odds ratio (OR)                                | 95% CI | Odds ratio (OR)                                                          | 95% CI |

FY = Foundation Year; \* Potentially clinically relevant PEs (either significant, serious or life-threatening) vs. minor errors; \*\* Speciality trainees include GPST1-3, CT1-2 and ST4-6 medical grades; \*\*\* see table 2 for a list of PE subcategories; † = no odds ratio for risk of at least one PE as no denominator data collected for medication classes

For peer review only

## DISCUSSION

### Main findings

This is the first study to prospectively identify the prevalence, nature and predictors of inpatient prescribing errors in mental health hospitals for newly written or omitted prescription items, finding an overall rate of 6.3% (95% CI 5.6-7.1%). Most of the PEs identified related to omissions of drugs on admission to or discharge from hospital as well as missing or incorrect prescription requirements (e.g. dose, frequency, signatures, formulations). Over half (56%) of all 288 errors identified were considered to be clinically relevant with the potential to cause patient harm, with 20 (6.9%) being graded as potentially serious or life-threatening. Speciality trainees and staff grade psychiatrists were more likely to make a PE, with speciality trainees and consultants more likely to make a potentially clinically relevant PE. Rewritten and discharge prescription items were significantly less likely to contain a PE than those written during patient stay, but were found to be at higher risk of potentially clinically relevant errors (especially on admission and discharge, where the risk was 5 and 4 times that of during stay, respectively). PE subtypes including prescription writing errors were associated with significantly lower risks of potentially clinically relevant PEs when compared to groups which included omitted and duplicated drugs. Electronic prescribing and the 'central nervous system' drug class (which contains all psychotropic medicines) were found not to be associated with an increased risk of clinically relevant PEs.

### Implications of findings

Our overall PE rate of 6.3% is higher than the 2.2%<sup>[18]</sup> and 2.4%<sup>[22]</sup> previously reported in UK psychiatric hospitals using prospective medication chart review, and similar to a median rate of 7 per 100 medication orders reported in general hospitals worldwide.<sup>[2]</sup> However,

1  
2  
3 differences in the type of prescription items that were assessed (i.e. we included both newly  
4 omitted and written items), the data collection periods (4 days<sup>[18]</sup> or 5 days<sup>[22]</sup> versus 10 in  
5 this study), severity assessments, study settings and year of publication preclude more direct  
6 comparisons.<sup>[2,34]</sup> Recent UK based general hospital PE investigations using similar  
7 methodology as this study reported higher PE rates,<sup>[7,8]</sup> which may reflect different patient  
8 complexities, the working environment, the medicines used (e.g. intravenous medicines are  
9 rarely used in psychiatry) and the predominant focus on mental health rather than physical  
10 health in psychiatry settings. In contrast, retrospective reviews of case notes / medication  
11 charts to identify PEs in psychiatry<sup>[25]</sup> yields higher error rates of 15% of error opportunities  
12 although the denominator and setting of this study was different to ours.  
13  
14  
15  
16  
17  
18  
19  
20  
21  
22  
23  
24

25  
26 The finding that a sizeable proportion of PEs concerned dosing errors or incomplete  
27 prescription items has been noted in other studies of PEs in psychiatry,<sup>[18,20,22]</sup> and in general  
28 hospitals.<sup>[2,7-9]</sup> However, whilst studies in general hospitals also found that the omission of  
29 drugs on admission/discharge/rewritten prescriptions were a leading PE subtype,<sup>[2,7-9]</sup>  
30 previous studies in psychiatry did not<sup>[18,20,22]</sup> which could relate to how pharmacy services  
31 were organised at the time.<sup>[13]</sup> Omission of drugs on patient transfer may arise due to  
32 inadequate communication of drug information<sup>[8,35]</sup> an issue which may affect mental health  
33 settings more acutely given the increasing number of community services creating more care  
34 transfer interfaces.<sup>[13,36,37]</sup> One UK study found that 69% and 43% of hospital admission and  
35 discharge medicines were affected by a medication discrepancy, respectively<sup>[17]</sup> and more  
36 recently studies found 50% of hospital admissions (UK based)<sup>[38]</sup> and 23% of discharges  
37 (USA based)<sup>[39]</sup> were affected, with the most common types being drug omissions. These  
38 studies highlight the importance of medicines reconciliation, a practice which is established  
39 in UK mental health hospitals<sup>[40]</sup> and which has shown value in general hospital settings.<sup>[41,42]</sup>  
40  
41  
42  
43  
44  
45  
46  
47  
48  
49  
50  
51  
52  
53  
54  
55  
56  
57  
58  
59  
60

1  
2  
3 Despite the prevalence of drug omission errors during care transfer the patient admission  
4 stage was not associated with significantly higher PE rates than during patient stay in this  
5 study, with the re-write and discharge stages associated with a significantly lower risks of  
6 PEs. However, errors occurring on admission, re-write and discharge were more likely to  
7 harm patients (considered as clinically significant errors – potential to cause significant,  
8 serious or life-threatening harm), which could reflect the fact that errors could cause  
9 immediate deterioration in a patients clinical condition and/or go unnoticed for long periods  
10 of time. The clear dangers posed by patient transfer in psychiatry have been recognised  
11 nationally in the UK,<sup>[37,43]</sup> though overall this challenge has received less attention than in  
12 general hospitals.<sup>[13,15,36]</sup> Future research should seek to clarify the frequency, nature and  
13 severity of PEs across and between care interfaces in the mental health setting, as well as  
14 investigating further the impact of medicines reconciliation.  
15  
16  
17  
18  
19  
20  
21  
22  
23  
24  
25  
26  
27  
28  
29

30 This study has indicated that more senior speciality trainees and staff grade psychiatrists are  
31 at a significantly increased risk of making a PE when compared to their FY one colleagues.  
32 This is in contrast to the EQUIP study, which found that junior doctors were more likely to  
33 make PEs.<sup>[7]</sup> The regression analysis also revealed that consultants were at a higher risk of  
34 making potentially severe PEs, along with speciality trainees when compared to FY one  
35 doctors. Whilst senior doctor prescribing has not been formerly evaluated in psychiatry in  
36 relation to PEs, the bulk of prescribing on admission and discharge (where more clinically  
37 significant errors occurred) was carried out by speciality trainees, which may explain why  
38 this association was found. Consultant prescribing may be more complex and risky than  
39 junior doctor prescribing, with negative perceptions towards prescription re-writes from  
40 medical staff noted in research from general hospitals also potentially contributing.<sup>[11]</sup> Future  
41 research should investigate in detail the prescribing of more senior clinicians in mental health,  
42  
43  
44  
45  
46  
47  
48  
49  
50  
51  
52  
53  
54  
55  
56  
57  
58  
59  
60

1  
2  
3 as previous studies making similar comparisons did not do so in the context of total  
4  
5 prescribing burdens using multivariate regression analysis.<sup>[18,22]</sup>  
6  
7

8 This study has emphasised the importance of pharmacy teams in the detection and prevention  
9  
10 of PEs and associated patient harms in mental health hospitals, as seen elsewhere.<sup>[9,18,20,22,25,38]</sup>  
11

12 Despite their important contribution to medicines safety and governance there has been less  
13  
14 investment in pharmacy services in UK mental health when compared to acute hospitals.<sup>[43,44]</sup>  
15

16 Given the important contribution of medicines to avoidable harm in hospitals, the input of  
17  
18 pharmacy teams in keeping patients safe should not be underestimated.<sup>[43,44]</sup>  
19  
20

21  
22 Our analysis did not reveal any difference in the risk of a PE between electronic and hand  
23  
24 written prescriptions, though this should be viewed with caution as the number of  
25  
26 electronically prescribed items in our analysis was low and the nature of this type of  
27  
28 prescribing was limited to discharge prescription templates at one study site (i.e. no  
29  
30 commercially available e-prescribing software was used). Although the benefits of electronic  
31  
32 prescribing software should not be overlooked<sup>[15]</sup> further investigation may be required as  
33  
34 despite important reductions in some errors the wider effects of electronic prescribing  
35  
36 systems on MEs and ADEs is not clear, and in some cases novel PE opportunities may be  
37  
38 created.<sup>[45]</sup>  
39  
40  
41  
42

43 To our knowledge, there have been no published attempts to determine the causes of PEs in  
44  
45 inpatient mental health settings despite growing understanding in general hospitals that these  
46  
47 errors involve multiple, interacting antecedents.<sup>[8,10-12]</sup> Although a number of different  
48  
49 interventions designed to reduce PEs have been suggested,<sup>[46]</sup> future research should focus on  
50  
51 determining the causes of PEs in psychiatry using theoretical frameworks such as Reasons  
52  
53 Model of Accident Causation,<sup>[47]</sup> so that the value of these interventions can be measured in  
54  
55 this setting.  
56  
57  
58  
59  
60

### Strengths and limitations

Key strengths of this study are that it was larger<sup>[18,20]</sup> and lasted for a longer duration<sup>[18,22]</sup> than previous work, used standardised training of data collectors, employed a data collection technique to minimise the risk of double counting or including previously corrected items and sought to compare risk of PEs and clinically relevant errors between prescribing stages and different prescribers.

Combined medication chart and case note review may identify a greater number of PEs,<sup>[30]</sup> so our PE rate maybe an underestimate of the true burden of these errors in mental health hospitals. Whilst data collectors were trained using standardised materials it is impossible to exclude variation in error detection due to differing capacity, vigilance and/or individual clinical experience of collectors.<sup>[9,22]</sup> The rate of false positives was minimised by using a multidisciplinary PE review panel, one senior member of which (SDW) had previously evaluated prescribing errors in a much larger study.<sup>[7]</sup> We did not record separate PE rate data for core medical versus general practitioner speciality trainees or psychotropic versus non-psychotropic medicines, which means that we were unable to compare these different groups.

The fact that unknown prescribers were associated with the highest PE rate (7.9% (4.7–11.1%)) highlights the need to ascertain the identity of prescribers as well as when and where prescribing took place in order to facilitate optimal patient care and rectify mistakes promptly. Prescriber identification becomes an even more critical issue given the more recent emphasis on the importance of feedback to improve prescribing practice and minimise PEs.<sup>[7,8,46,48]</sup>

## CONCLUSION

Prescribing errors may be more common in mental health hospitals than previously reported, and continue to pose a significant challenge to healthcare providers as the majority have the potential to cause patient harm. This study has identified more senior prescribers and care transfer interfaces as potential targets to investigate the burden of these errors in more detail with the aim of formulating remedial approaches. Future work should focus on using theoretical frameworks such as those of human error to investigate the causes of PEs in order to inform the design of interventions aimed at reducing their burden in the psychiatric inpatient setting.

## Acknowledgements

We would like to thank all the pharmacy teams involved in data collection as well as Yin Kwok, Mayamiko Kaoma and Janette Chu for their assistance with data entry.

## Competing interests

All the authors have no competing interests to declare. This work has not been posted or published elsewhere in its entirety. An abstract summarising the study will soon be published after oral presentation at the Prescribing and Research in Medicines Management (PRIMM) Annual Scientific Meeting 2014 (2<sup>nd</sup> May, London, UK).

## Funding

This research received no specific grant from any funding agency in the public, commercial or not-for-profit sectors. This study was funded by the University of Manchester and participating mental health NHS Trusts. The sponsors had no role in study design, in the collection, analysis and interpretation of data, or in the writing of the report and in the decision to submit the report for publication.

## Contributor statement

Design of study: all authors. Review of study data (expert panel): RNK, JJV, SDW. Analysis of data: RNK, DMA. Preparation of manuscript: RNK. Critical review of manuscript: all authors. Approval of submitted manuscript (current version): all authors.



**REFERENCES**

1. de Vries EN, Ramrattan MA, Smorenburg SM, et al. The incidence and nature of in-hospital adverse events: a systematic review. *Qual Saf Health Care* 2008;17(3):216-223.
2. Lewis PJ, Dornan T, Taylor D, et al. Prevalence, incidence and nature of prescribing errors in hospital inpatients: a systematic review. *Drug Saf* 2009;32(5):379-389.
3. Keers RN, Williams SD, Cooke J, et al. Prevalence and nature of medication administration errors in health care settings: A Systematic Review of Direct Observational Evidence. *Ann Pharmacother* 2013;47(2):237-256.
4. Kopp BJ, Erstad BL, Allen ME, et al. Medication errors and adverse drug events in an intensive care unit: direct observation approach for detection. *Crit Care Med* 2006;34(2):415-425.
5. Buckley MS, Erstad BL, Kopp BJ, et al. Direct observation approach for detecting medication errors and adverse drug events in a pediatric intensive care unit. *Pediatr Crit Care Med* 2007;8(2):145-152.
6. Carayon P, Wetterneck TB, Cartmill R, et al. Characterising the complexity of medication safety using a human factors approach: an observational study in two intensive care units. *BMJ Qual Saf* 2014;23(1):56-65.
7. Dornan T, Ashcroft D, Heathfield H, et al. An in depth investigation into causes of prescribing errors by foundation trainees in relation to their medical education. EQUIP study. 2009. Accessed at: [http://www.gmc-uk.org/FINAL\\_Report\\_prevalence\\_and\\_causes\\_of\\_prescribing\\_errors.pdf\\_28935150.pdf](http://www.gmc-uk.org/FINAL_Report_prevalence_and_causes_of_prescribing_errors.pdf_28935150.pdf) (accessed 10/03/2014).
8. Franklin BD, Reynolds M, Shebl NA, et al. Prescribing errors in hospital inpatients: a three-centre study of their prevalence, types and causes. *Postgrad Med J* 2011;87(1033):739-745.
9. Seden K, Kirkham JJ, Kennedy T, et al. Cross-sectional study of prescribing errors in patients admitted to nine hospitals across North West England. *BMJ Open* 2013;3(1):pii: e002036. doi: 10.1136/bmjopen-2012-002036.
10. Tully MP, Ashcroft DM, Dornan T, et al. The causes of and factors associated with prescribing errors in hospital inpatients: a systematic review. *Drug Saf* 2009;32(10):819-836.
11. Ross S, Ryan C, Duncan EM, et al. Perceived causes of prescribing errors by junior doctors in hospital inpatients: a study from the PROTECT programme. *BMJ Qual Saf* 2013;22(2):97-102.
12. Lewis PJ, Ashcroft DM, Dornan T, et al. Exploring the causes of junior doctors' prescribing mistakes: a qualitative study. *Br J Clin Pharmacol* 2014. Published Online First 11 February 2014. doi: 10.1111/bcp.12332

- 1  
2  
3 13. Maidment ID, Lelliott P, Paton C. Medication errors in mental healthcare: a systematic  
4 review. *Qual Saf Health Care* 2006;15(6):409-413.
- 5  
6  
7 14. Mann K, Rothschild JM, Keohane CA, et al. Adverse drug events and medication errors  
8 in psychiatry: methodological issues regarding identification and classification. *World J Biol*  
9 *Psychiatry* 2008;9(1):24-33.
- 10  
11  
12 15. Procyshyn RM, Barr AM, Brickell T, et al. Medication errors in psychiatry: a  
13 comprehensive review. *CNS Drugs* 2010;24(7):595-609.
- 14  
15  
16 16. Nirodi P, Mitchell AJ. The quality of psychotropic drug prescribing in patients in  
17 psychiatric units for the elderly. *Aging Ment Health* 2002;6(2):191-196.
- 18  
19  
20 17. Morcos S, Francis S-A, Duggan C. Where are the weakest links?: A descriptive study of  
21 discrepancies in prescribing between primary and secondary sectors of mental health service  
22 provision. *Psychiatric Bull* 2002;26:371-374.
- 23  
24  
25 18. Haw C, Stubbs J. Prescribing errors detected by pharmacists at a psychiatric hospital.  
26 *Pharmacy In Practice* 2003;10:64-66.
- 27  
28  
29 19. Paton C, Gill-Banham S. Prescribing errors in psychiatry. *Psychiatric Bull* 2003;27:208-  
30 210.
- 31  
32  
33 20. Stubbs J, Haw C, Cahill C. Auditing prescribing errors in a psychiatric hospital. Are  
34 pharmacists' interventions effective? *Hosp Pharm* 2004;11:203-206.
- 35  
36  
37 21. Maidment ID, Thorn A. A medication error reporting scheme: analysis of the first 12  
38 months. *Psychiatric Bull* 2005;29:298-301.
- 39  
40  
41 22. Stubbs J, Haw C, Taylor D. Prescription errors in psychiatry - a multi-centre study. *J*  
42 *Psychopharmacol* 2006;20(4):553-561.
- 43  
44  
45 23. Haw C, Cahill C. A computerized system for reporting medication events in psychiatry:  
46 The first two years of operation. *J Psychiatr Ment Health Nurs* 2011;18(4):308-315.
- 47  
48  
49 24. Grasso BC, Genest R, Yung K, et al. Reducing errors in discharge medication lists by  
50 using personal digital assistants. *Psychiatr Serv* 2002;53(10):1325-1326.
- 51  
52  
53 25. Grasso BC, Genest R, Jordan CW, et al. Use of chart and record reviews to detect  
54 medication errors in a state psychiatric hospital. *Psychiatr Serv* 2003;54(5):677-681.
- 55  
56  
57 26. Rothschild JM, Mann K, Keohane CA, et al. Medication safety in a psychiatric hospital.  
58 *Gen Hosp Psychiatry* 2007;29(2):156-162.
- 59  
60 27. Jayaram G, Doyle D, Steinwachs D, et al. Identifying and reducing medication errors in  
psychiatry: creating a culture of safety through the use of an adverse event reporting  
mechanism. *J Psychiatr Pract* 2011;17(2):81-88.

- 1  
2  
3 28. Soerensen AL, Lisby M, Nielsen LP, et al. The medication process in a psychiatric  
4 hospital: are errors a potential threat to patient safety? *Risk Manag Healthc Policy* 2013;6:23-  
5 31.  
6  
7  
8 29. Maidment ID, Haw C, Stubbs J, et al. Medication errors in older people with mental  
9 health problems: a review. *Int J Geriatr Psychiatry* 2008;23(6):564-573.  
10  
11 30. Franklin BD, Birch S, Savage I, et al. Methodological variability in detecting prescribing  
12 errors and consequences for the evaluation of interventions. *Pharmacoepidemiol Drug Saf*  
13 2009;18(11):992-999.  
14  
15 31. Meyer-Massetti C, Cheng CM, Schwappach DL, et al. Systematic review of medication  
16 safety assessment methods. *Am J Health Syst Pharm* 2011;68(3):227-240.  
17  
18 32. Dean B, Barber N, Schachter M. What is a prescribing error? *Qual Health Care*  
19 2000;9(4):232-237.  
20  
21 33. Joint Formulary Committee. *British National Formulary*. 66<sup>th</sup> ed. London: BMJ Group  
22 and Pharmaceutical Press, 2013.  
23  
24 34. Garfield S, Reynolds M, Dermont L, et al. Measuring the severity of prescribing errors: a  
25 systematic review. *Drug Saf* 2013;36(12):1151-1157.  
26  
27 35. Kripalani S, Jackson AT, Schnipper JL, et al. Promoting effective transitions of care at  
28 hospital discharge: a review of key issues for hospitalists. *J Hosp Med* 2007;2(5):314-323.  
29  
30 36. Maidment ID, Parmentier H. Medication error in mental health: implications for primary  
31 care. *Ment Health Fam Med* 2009;6(4):203-207.  
32  
33 37. National Patient Safety Agency. *Safety in doses: improving the use of medicines in the*  
34 *NHS*. 2009. Available at:  
35 [http://www.nrls.npsa.nhs.uk/EasySiteWeb/getresource.axd?AssetID=61626&type=full&servi](http://www.nrls.npsa.nhs.uk/EasySiteWeb/getresource.axd?AssetID=61626&type=full&servicetype=...)  
36 [cetype=...](http://www.nrls.npsa.nhs.uk/EasySiteWeb/getresource.axd?AssetID=61626&type=full&servicetype=...) (accessed 10/03/2014).  
37  
38  
39  
40  
41 38. Brownlie K, Schneider C, Culliford R, et al. Medication reconciliation by a pharmacy  
42 technician in a mental health assessment unit. *Int J Clin Pharm* 2013. Published online first:  
43 15 November 2013. doi: 10.1007/s11096-013-9875-8.  
44  
45 39. Nelson LA, Graham MR, Schaefer MG. Characterization of medication discrepancies  
46 occurring at the time of hospital discharge from an adult state psychiatric inpatient facility.  
47 *Hosp Pharm* 2011; 46(4): 254-261.  
48  
49 40. Paton C, McIntyre S, Bhatti SF, et al. Medicines reconciliation on admission to inpatient  
50 psychiatric care: findings from a UK quality improvement programme. *Ther Adv*  
51 *Psychopharmacol* 2011;1(4):101-110.  
52  
53 41. Mueller SK, Sponsler KC, Kripalani S, et al. Hospital-based medication reconciliation  
54 practices: a systematic review. *Arch Intern Med* 2012;172(14):1057-1069.  
55  
56  
57  
58  
59  
60

- 1  
2  
3 42. Kwan JL, Lo L, Sampson M, et al. Medication reconciliation during transitions of care as  
4 a patient safety strategy: a systematic review. *Ann Intern Med* 2013;158(5 Pt 2):397-403.  
5  
6 43. National Mental Health Development Unit. Getting the Medicines Right: medicines  
7 management in adult and older adult acute mental health wards. 2009. Available at:  
8 <http://www.nmhdu.org.uk/silo/files/getting-the-medicines-right--jul-2009.pdf> (accessed  
9 10/03/2014).  
10  
11 44. Healthcare Commission. Talking about medicines: the management of medicines in trusts  
12 providing mental health services. London: Commission for Healthcare Audit and Inspection,  
13 2007.  
14  
15 45. Tully MP. Prescribing errors in hospital practice. *Br J Clin Pharmacol* 2012;74(4):668-  
16 675.  
17  
18 46. The Health Foundation. Evidence scan: reducing prescribing errors. 2012. Available at:  
19 [http://www.health.org.uk/public/cms/75/76/313/3337/Reducing%20prescribing%20errors%20-](http://www.health.org.uk/public/cms/75/76/313/3337/Reducing%20prescribing%20errors%20-%20evidence%20scan.pdf?realName=3bXWvp.pdf)  
20 [0-%20evidence%20scan.pdf?realName=3bXWvp.pdf](http://www.health.org.uk/public/cms/75/76/313/3337/Reducing%20prescribing%20errors%20-%20evidence%20scan.pdf?realName=3bXWvp.pdf) (accessed 10/03/2014).  
21  
22 47. Reason J. Human Error. Cambridge: Cambridge University Press, 1990.  
23  
24 48. Brennan N, Mattick K. A systematic review of educational interventions to change  
25 behaviour of prescribers in hospital settings, with a particular emphasis on new prescribers.  
26 *Brit J Clin Pharmacol* 2013;75(2):359-372.  
27  
28  
29  
30  
31  
32  
33  
34  
35  
36  
37  
38  
39  
40  
41  
42  
43  
44  
45  
46  
47  
48  
49  
50  
51  
52  
53  
54  
55  
56  
57  
58  
59  
60

# BMJ Open

## Prevalence, nature and predictors of prescribing errors in mental health hospitals: a prospective multicentre study

|                                 |                                                                                                                                                                                                                                                                                                                                                                                                                                                                                                                                                                                   |
|---------------------------------|-----------------------------------------------------------------------------------------------------------------------------------------------------------------------------------------------------------------------------------------------------------------------------------------------------------------------------------------------------------------------------------------------------------------------------------------------------------------------------------------------------------------------------------------------------------------------------------|
| Journal:                        | <i>BMJ Open</i>                                                                                                                                                                                                                                                                                                                                                                                                                                                                                                                                                                   |
| Manuscript ID:                  | bmjopen-2014-006084.R1                                                                                                                                                                                                                                                                                                                                                                                                                                                                                                                                                            |
| Article Type:                   | Research                                                                                                                                                                                                                                                                                                                                                                                                                                                                                                                                                                          |
| Date Submitted by the Author:   | 12-Aug-2014                                                                                                                                                                                                                                                                                                                                                                                                                                                                                                                                                                       |
| Complete List of Authors:       | Keers, Richard; University of Manchester, Centre for Pharmacoepidemiology and Drug Safety Research<br>Williams, Steve; UHSM, Pharmacy; University of Manchester<br>Vattakatuchery, Joe; 5 Borough's Partnership NHS Foundation Trust, Adult Services, Warrington<br>Brown, Petra; Manchester Mental Health and Social Care NHS Trust, Pharmacy<br>Miller, Joan; Greater Manchester West Mental Health NHS Foundation Trust, Pharmacy<br>Prescott, Lorraine; 5 Borough's Partnership NHS Foundation Trust, Medicines Management Team<br>Ashcroft, Darren; University of Manchester |
| <b>Primary Subject Heading</b>: | Health services research                                                                                                                                                                                                                                                                                                                                                                                                                                                                                                                                                          |
| Secondary Subject Heading:      | Mental health, Pharmacology and therapeutics, Health services research, Epidemiology                                                                                                                                                                                                                                                                                                                                                                                                                                                                                              |
| Keywords:                       | Clinical governance < HEALTH SERVICES ADMINISTRATION & MANAGEMENT, Quality in health care < HEALTH SERVICES ADMINISTRATION & MANAGEMENT, PSYCHIATRY                                                                                                                                                                                                                                                                                                                                                                                                                               |
|                                 |                                                                                                                                                                                                                                                                                                                                                                                                                                                                                                                                                                                   |

SCHOLARONE™  
Manuscripts

1  
2  
3 **Prevalence, nature and predictors of prescribing errors in mental health hospitals: a**  
4  
5 **prospective multicentre study**  
6  
7

8 **Running title:** Prescribing errors in mental health hospitals  
9

10  
11 Richard N Keers, Lecturer in Pharmacy Practice<sup>1,2</sup>  
12

13 Steven D Williams, Honorary Clinical Lecturer<sup>1</sup> and Consultant Pharmacist in Medicine and  
14  
15 Medication Safety<sup>3</sup>  
16

17 Joe J Vattakatuchery, Lead Consultant Psychiatrist<sup>4</sup> and Honorary Clinical Lecturer<sup>5</sup>  
18

19 Petra Brown, Chief Pharmacist<sup>6</sup>  
20

21 Joan Miller, Deputy Director of Pharmacy<sup>7</sup>  
22

23 Lorraine Prescott, Chief Pharmacist<sup>8</sup>  
24

25 Darren M Ashcroft, Professor of Pharmacoepidemiology<sup>1,2</sup>  
26  
27

28  
29  
30 <sup>1</sup> Centre for Pharmacoepidemiology and Drug Safety Research, Manchester Pharmacy School, Manchester  
31 Academic Health Sciences Centre (MAHSC), University of Manchester, Manchester, United Kingdom (UK)  
32

33 <sup>2</sup>NIHR Greater Manchester Primary Care Patient Safety Translational Research Centre, MAHSC, University of  
34 Manchester, Manchester, UK.  
35

36 <sup>3</sup>Pharmacy Department, University Hospital of South Manchester NHS Foundation Trust, MAHSC, Manchester  
37

38 <sup>4</sup>Adult Services Warrington, 5 Boroughs Partnership NHS Foundation Trust, Warrington, Cheshire, UK  
39

40 <sup>5</sup>Medical School, University of Liverpool, Liverpool, UK  
41

42 <sup>6</sup>Pharmacy Department, Manchester Mental Health and Social Care Trust, MAHSC, Manchester, UK  
43

44 <sup>7</sup>Pharmacy Department, Greater Manchester West Mental Health NHS Foundation Trust, Salford, UK  
45

46 <sup>8</sup>Medicines Management Team, 5 Boroughs Partnership NHS Foundation Trust, Warrington, Cheshire, UK  
47  
48

49 **Correspondence:** R N Keers Tel: (+44)161 275 2414, Fax: (+44)1612752416,  
50

51 [richard.keers@manchester.ac.uk](mailto:richard.keers@manchester.ac.uk)  
52

53 **Word count main text: 3939 / Abstract word count: 285**  
54

55 **Keywords:** Medication errors; psychiatry; mental health; hospitals  
56

57 **Number of tables: 5 / Number of figures: 0**  
58  
59  
60

## ABSTRACT

**Objective:** To determine the prevalence, nature and predictors of prescribing errors (PEs) in three mental health hospitals.

**Setting:** Inpatient units in three National Health Service (NHS) mental health hospitals in the North West of England.

**Participants:** Trained clinical pharmacists prospectively recorded the number of PEs in newly written or omitted prescription items screened during their routine work on 10 data collection days. A multidisciplinary panel reviewed PE data using established methods to confirm (a) the presence of a PE, (b) the type of PE and (c) whether errors were clinically relevant and likely to cause harm.

**Primary outcome measures:** Frequency, nature and predictors of PEs.

**Results:** Of 4427 screened prescription items, 281 were found to have one or more PEs (error rate 6.3% (95% CI 5.6–7.1%)). Multivariate analysis revealed that speciality trainees (OR 1.23 (1.01-1.51)) and staff grade psychiatrists (OR 1.50 (1.05-2.13)) were more likely to make PEs when compared to foundation year (FY) one doctors, and that speciality trainees and consultant psychiatrists were twice as likely to make clinically relevant PEs (OR 2.61 (2.11-3.22) and 2.03 (1.66-2.50) respectively) compared to FY one staff. Prescription items screened during prescription chart rewrite (OR 0.52 (0.33-0.82)) or at discharge (OR 0.87 (0.79-0.97)) were less likely to be associated with PEs than items assessed during inpatient stay, although they were more likely to be associated with clinically relevant PEs (OR 2.27 (1.72-2.99) and 4.23 (3.68-4.87) respectively). Prescription items screened at hospital admission were five times more likely (OR 5.39 (2.72-10.69)) to be associated with clinically relevant errors than those screened during patient stay.

1  
2  
3 **Conclusions:** Prescribing errors may be more common in mental health hospitals than  
4  
5 previously reported and important targets to minimise these errors have been identified.  
6  
7  
8  
9

#### 10 11 **STRENGTHS AND LIMITATIONS OF THIS STUDY** 12

- 13  
14 • Using standardised methods, this study has for the first time prospectively determined  
15 the prevalence, nature and predictors of prescribing errors across three mental health  
16 hospitals.  
17  
18  
19
- 20  
21 • Important potential targets were identified for future research to minimise prescribing  
22 errors in this setting.  
23  
24  
25
- 26  
27 • Whilst this was a large study, its findings may not be generalizable to inpatient  
28 psychiatric care across the NHS.  
29  
30  
31  
32  
33  
34  
35  
36  
37  
38  
39  
40  
41  
42  
43  
44  
45  
46  
47  
48  
49  
50  
51  
52  
53  
54  
55  
56  
57  
58  
59  
60



## INTRODUCTION

Medication errors (MEs) and their associated adverse drug events (ADEs) continue to pose significant challenges for healthcare systems worldwide.<sup>[1-3]</sup> Errors in drug prescribing and administration appear to be the most common MEs.<sup>[4-6]</sup> In general hospitals prescribing errors (PEs) are estimated to affect between 2% and 15% of medication orders<sup>[2,7-9]</sup> and are thought to arise from multiple, interacting causes.<sup>[8,10-12]</sup>

Despite much research activity attempting to understand the frequency, causes and preventive strategies for MEs in general hospital settings, mental health hospitals have been given much less attention.<sup>[2,13-15]</sup> Published studies of PEs (and/or related ADEs) originate from the United Kingdom (UK),<sup>[9,16-23]</sup> United States of America (USA)<sup>[24-27]</sup> and Denmark.<sup>[28]</sup> In common with reviews of general hospital studies,<sup>[2]</sup> differences in study methods, settings and definitions preclude synthesis of PE data from relevant studies to gain an overall measure of their impact.<sup>[13,15,29]</sup>

Not surprisingly, different ME/ADE identification methods influence the outcome rate.<sup>[2,14,30]</sup>

It is accepted that voluntary self-reporting methods such as incident reports grossly underestimate the numbers of MEs that occur when compared to chart review and other detection methods,<sup>[30,31]</sup> which may make subsequent error rates unrepresentative of the practice environment. A number of PE studies carried out in mental health utilised incident/self-reports<sup>[21,23]</sup> with others using retrospective medication chart review (with or without incident reports / case note review / direct observation).<sup>[16,17,24,25,28]</sup> Prospective identification of PEs in UK psychiatry has most commonly involved pharmacists checking prescription charts over different time periods,<sup>[9,18-20,22]</sup> yielding error rates of 2.2%<sup>[18]</sup> and 2.4%<sup>[22]</sup> of prescription items checked (two studies did not provide a denominator<sup>[19,20]</sup>) and

1  
2  
3 31.3% of whole prescriptions checked.<sup>[9]</sup> Between 42.1% and 65% of PEs are administered to  
4  
5 patients before correction by the pharmacist.<sup>[18,20,22]</sup>  
6  
7

8 To our knowledge, no studies have utilised prospective screening of only newly written or  
9  
10 omitted prescription items by pharmacists in psychiatry inpatients to find PEs, as seen in  
11  
12 general hospitals.<sup>[7]</sup> This design may reduce the possibility of underestimating PE rates if  
13  
14 errors which have previously been checked and corrected by healthcare staff prior to  
15  
16 examination by data collectors are included.<sup>[9,18,20,22]</sup> In addition, previous studies in  
17  
18 psychiatry have not investigated the differences in PE rates or severity between different  
19  
20 prescribers and prescribing stages.<sup>[18,20,22]</sup> This study aimed to determine the prevalence,  
21  
22 nature and predictors of inpatient prescribing errors in UK mental health settings.  
23  
24  
25  
26  
27  
28  
29  
30  
31  
32  
33  
34  
35  
36  
37  
38  
39  
40  
41  
42  
43  
44  
45  
46  
47  
48  
49  
50  
51  
52  
53  
54  
55  
56  
57  
58  
59  
60

## METHOD

### Settings

Three mental health NHS trusts based in the North West of England took part in the study, including more than 50 inpatient wards across more than 10 hospitals and other smaller facilities. Each trust provided a range of inpatient and community services. On weekdays, clinical pharmacists checked inpatient paper prescription charts written on admission, during patient stay, upon chart re-write (charts were rewritten by prescribers once administration records were complete), on paper leave prescriptions (prescriptions used by patients who could leave the ward temporarily, e.g. for a home visit) and on paper discharge prescriptions. Medication lists were reconciled on admission predominantly by pharmacy teams using sources that included the patient, their General Practitioner (GP) records and any medication brought into hospital. One study site used an electronic prescription pro-forma at discharge. Medications were administered by registered nurses or by patients using self-administration. Pharmacist prescription chart review involved confirming the clarity, completeness and clinical appropriateness of each prescribed item, and occurred daily on some wards (e.g. acute adult units) but less frequently on others (e.g. long stay forensic units). Where necessary, patients' medical notes were accessed as part of the pharmacists' assessment of prescribing safety. All inpatient units visited by pharmacists on data collection days were included in the study. Outpatient prescriptions were excluded.

### Definitions

The definition of a PE used in this study has been used extensively in prescribing error research.<sup>[2,7-9,18,20,22]</sup> 'A clinically meaningful prescribing error occurs when, as a result of a prescribing decision or prescription-writing process, there is an unintentional significant

1  
2  
3 reduction in the probability of treatment being timely and effective, or an increase in the risk  
4  
5 of harm when compared with generally accepted practice.<sup>9[32]</sup> This definition was  
6  
7 accompanied by a list of situations that should be included and excluded as PEs. However, as  
8  
9 the mental health environment differs from typical hospital settings upon which this  
10  
11 definition was based, we extended its scope to include the following scenarios based on  
12  
13 earlier work:<sup>[18,20,22]</sup> (a) prescribing a drug without first registering a patient with the  
14  
15 appropriate monitoring service (e.g. Clozapine Patient Monitoring Service (CPMS)) and (b)  
16  
17 prescribing a drug to treat mental health illness without authorisation from a Mental Health  
18  
19 Act form (e.g. form T2/T3, Advance Decision).  
20  
21  
22

### 23 **Data collection**

24  
25 The process of recording inpatient prescribing errors was based on the UK EQUIP study.<sup>[7]</sup>  
26  
27 Twenty nine clinical pharmacists employed across the study sites identified PEs for all newly  
28  
29 prescribed/written or omitted items as part of their routine clinical practice in this setting  
30  
31 during a total of 10 data collection days individually selected between January – April 2013.  
32  
33 Omitted items were identified after reconciliation on admission or after comparison with  
34  
35 earlier inpatient prescribing documentation, and their inclusion in the denominator ensured  
36  
37 that pharmacists were able to determine whether items were omitted for a valid clinical  
38  
39 reason before recording them as a PE. One data collection day per week was purposively  
40  
41 chosen to ensure coverage of all weekdays at least once according to local capacity, with a  
42  
43 complete day including the period from 5pm on the previous day until 5pm on the assigned  
44  
45 data collection day. On Mondays, this period was extended to include prescriptions written  
46  
47 from 5pm the previous Friday throughout the weekend.  
48  
49  
50  
51  
52

53  
54 Data on the number of newly prescribed or omitted items and the corresponding number of  
55  
56 errors were entered onto two standardised forms by pharmacists based on earlier work<sup>[7]</sup> and  
57  
58  
59  
60

1  
2  
3 underwent piloting at one participating site in December 2012. Newly prescribed orders  
4 included once only and when required items. Completion of these forms was for research  
5 purposes and was outside the pharmacists' normal duties, though time taken on this task was  
6 reported to be insignificant during pilot testing. For each prescribing error recorded,  
7 pharmacists were asked to record patient information, prescriber grade, stage of patient stay,  
8 a potential severity rating (including whether or not the error caused actual patient harm)  
9 along with details as to the nature of the PE. Each item checked could be associated with  
10 more than one prescribing error.  
11  
12  
13  
14  
15  
16  
17  
18  
19

20  
21 Pharmacist study co-ordinators based at each site used the same materials to provide training  
22 for participating pharmacists which also included question and answer sessions. A  
23 standardised guidebook (including definitions of PEs and potential severity assessment  
24 categories) was made available to data collectors for use at any point during the study and co-  
25 ordinators made regular contact with data collectors to answer any questions raised.  
26  
27  
28  
29  
30  
31  
32

### 33 **Error validation**

34  
35  
36 Validation of all recorded PEs was undertaken by a multidisciplinary panel which comprised  
37 one mental health clinical pharmacist (RNK), one consultant pharmacist in medicine and  
38 medication safety (SDW) and one consultant psychiatrist (JJV). The errors were reviewed  
39 and consensus was reached on (a) whether a genuine prescribing error had occurred, (b) type  
40 of error and (c) the potential severity of the error using established criteria.<sup>[7]</sup> PEs that were  
41 rated as either potentially clinically significant, serious or life-threatening were considered  
42 clinically relevant for patients.  
43  
44  
45  
46  
47  
48  
49  
50

### 51 **Data analysis**

1  
2  
3 Descriptive statistics were used to analyse frequency of error categories by prescriber grade  
4  
5 and prescribing stage, with additional investigations into the nature of PEs identified (route,  
6  
7 severity, type, drug class). Error rates were calculated as a percentage to measure the  
8  
9 prevalence of PEs by dividing the number of newly written or omitted prescription items with  
10  
11 at least one PE by the total number of these items screened and multiplying the answer by  
12  
13 100. Error rates were presented with corresponding 95% confidence intervals (CI).  
14  
15

16  
17 Logistic regression analyses were undertaken to examine (a) predictors of prescribing errors,  
18  
19 and (b) predictors of a clinically relevant error (potentially significant, serious or life-  
20  
21 threatening) compared to a minor error across different prescribers, prescribing stages, and  
22  
23 written vs. electronic discharge pro-forma prescribing. Analysis of potential error severity  
24  
25 also involved comparing errors occurring within the central nervous system class of  
26  
27 medicines (which includes all psychotropic medicines) versus all other medication classes,<sup>[33]</sup>  
28  
29 and comparing different subtypes of PEs that occurred. All logistic regression models were  
30  
31 adjusted for clustering at study site and results presented as adjusted odds ratios (OR) and  
32  
33 95% Confidence Intervals (CI). All calculations were undertaken using STATA V12®, and  
34  
35  $p < 0.05$  was used to indicate statistical significance.  
36  
37  
38  
39

## 40 **Ethics**

41  
42  
43 This study was granted ethical approval by the University of Manchester Research Ethics  
44  
45 Committee (12342) and approval was obtained by the Research and Development/Audit  
46  
47 Departments from each participating study site. Individual patient consent was not required  
48  
49 for this service evaluation.  
50  
51  
52  
53  
54  
55  
56  
57  
58  
59  
60

## RESULTS

During the study period 4427 newly written or omitted prescription items were assessed by study pharmacists across the three study sites. A total of 367 PEs were recorded, 79 of which were excluded during review by the expert panel. Good agreement was observed between panel members when reviewing errors, with the most common reason for exclusion at this stage being minor prescription writing incidents such as trivial spelling mistakes, missing information on prescriptions for use when required (e.g. no indication, no minimum dosage interval) or writing medication names without using capital letters.

After review by the expert panel, 281 newly prescribed or omitted items were found to be affected by 1 or more PEs, giving an error rate of 6.3% (95% CI 5.6-7.1%). Seven prescription items were affected by 2 PEs, giving a total of 288 detected errors. Table 1 displays PE rates by prescriber and stage of prescribing.

Orders prescribed on admission to hospital were associated with the highest PE rate (10.7% (95% CI 8.6-12.7%)) when compared to items prescribed during hospital stay (6.5% (5.3-7.8%)) or at discharge (6.5% (4.3-8.6%)). In contrast, items assessed on leave prescriptions (4.5% (1.9-7.0%)) and those that were re-written by prescribers (3.6% (2.6-4.6%)) had lower PE rates. Speciality trainees (general practitioner or psychiatry) were responsible for the majority of newly written or omitted items (52.8%) and had the highest PE rate (6.8% (5.8-7.8%)) after unknown prescribers (7.9% (4.6-11.1%)). Junior FY doctors generally had PE rates lower than their senior colleagues (FY one 5.1% (2.2-8.0%); FY two 4.9% (3.0-6.7%); staff grade 6.5% (4.2-8.7); consultant 5.8% (3.9-7.7%)).

**Table 1: Summary of prescribing errors by prescriber and prescribing stage**

| PRESCRIBER           | DESCRIPTION                                | PRESCRIBING STAGE   |                     |                     |                     |                     |         | TOTAL              |
|----------------------|--------------------------------------------|---------------------|---------------------|---------------------|---------------------|---------------------|---------|--------------------|
|                      |                                            | On admission        | During stay         | Rewritten           | Leave               | Discharge           | Unknown |                    |
| FY1*                 | Items written/omitted                      | 28                  | 68                  | 46                  | 17                  | 57                  | 0       | 216                |
|                      | Errors found                               | 1                   | 3                   | 2                   | 0                   | 5                   | 0       | 11                 |
|                      | % error rate<br>(95% confidence intervals) | 3.6%<br>(0.0-10.6%) | 4.4%<br>(0.0-9.3%)  | 4.3%<br>(0.0-10.3%) | 0%<br>(N/A)         | 8.8%<br>(1.4-16.2%) | -       | 5.1%<br>(2.2-8.0%) |
| FY2                  | Items written/omitted                      | 95                  | 124                 | 179                 | 79                  | 59                  | 0       | 536                |
|                      | Errors found                               | 5                   | 9                   | 5                   | 5                   | 2                   | 0       | 26                 |
|                      | % error rate<br>(95% confidence intervals) | 5.3%<br>(0.7-9.8%)  | 7.3%<br>(2.7-11.8%) | 2.8%<br>(0.4-5.2%)  | 6.3%<br>(0.9-11.7%) | 3.4%<br>(0.0-8.0%)  | -       | 4.9%<br>(3.0-6.7%) |
| Speciality Trainee** | Items written/omitted                      | 582                 | 734                 | 636                 | 114                 | 270                 | 0       | 2336               |
|                      | Errors found                               | 67                  | 50                  | 26                  | 3                   | 13                  | 0       | 159                |
|                      | % error rate<br>(95% confidence intervals) | 11.5%               | 6.8%                | 4.1%                | 2.6%                | 4.8%                | -       | 6.8%               |



| PRESCRIBER                      | DESCRIPTION                             | PRESCRIBING STAGE  |                 |                 |                   |                   |         | TOTAL                  |
|---------------------------------|-----------------------------------------|--------------------|-----------------|-----------------|-------------------|-------------------|---------|------------------------|
|                                 |                                         | On admission       | During stay     | Rewritten       | Leave             | Discharge         | Unknown |                        |
|                                 | intervals)                              | (8.9-14.1%)        | (5.0-8.6%)      | (2.5-5.6%)      | (0.0-5.6%)        | (2.3-7.4%)        |         | (5.8-7.8%)             |
| <b>Staff Grade Psychiatrist</b> | Items written/omitted                   | 42                 | 148             | 203             | 18                | 38                | 16      | <b>465</b>             |
|                                 | Errors found                            | 10                 | 9               | 5               | 2                 | 4                 | 0       | <b>30</b>              |
|                                 | % error rate (95% confidence intervals) | 23.8% (10.8-36.9%) | 6.1% (2.2-9.9%) | 2.5% (0.3-4.6%) | 11.1% (0.0-26.1%) | 10.5% (0.6-20.4%) | 0%      | <b>6.5% (4.2-8.7%)</b> |
| <b>Consultant Psychiatrist</b>  | Items written/omitted                   | 30                 | 378             | 124             | 13                | 38                | 3       | <b>586</b>             |
|                                 | Errors found                            | 3                  | 23              | 4               | 0                 | 4                 | 0       | <b>34</b>              |
|                                 | % error rate (95% confidence intervals) | 10.0% (0.0-20.9%)  | 6.1% (3.7-8.5%) | 3.2% (0.1-6.3%) | 0%                | 10.5% (0.6-20.4%) | 0%      | <b>5.8% (3.9-7.7%)</b> |
| <b>Pharmacist Prescriber</b>    | Items written/omitted                   | 0                  | 3               | 0               | 0                 | 7                 | 0       | <b>10</b>              |
|                                 | Errors found                            | 0                  | 0               | 0               | 0                 | 0                 | 0       | <b>0</b>               |

1  
2  
3  
4  
5  
6  
7  
8  
9  
10  
11  
12  
13  
14  
15  
16  
17  
18  
19  
20  
21  
22  
23  
24  
25  
26  
27  
28  
29  
30  
31  
32  
33  
34  
35  
36  
37  
38  
39  
40  
41  
42  
43  
44  
45  
46  
47  
48  
49

| PRESCRIBER                | DESCRIPTION                                | PRESCRIBING STAGE   |                     |                    |                      |                      |           | TOTAL                       |
|---------------------------|--------------------------------------------|---------------------|---------------------|--------------------|----------------------|----------------------|-----------|-----------------------------|
|                           |                                            | On admission        | During stay         | Rewritten          | Leave                | Discharge            | Unknown   |                             |
|                           | % error rate<br>(95% confidence intervals) | -                   | 0%                  | -                  | -                    | 0%                   | -         | <b>0%</b>                   |
| <b>Nurse Prescriber</b>   | Items written/omitted                      | 0                   | 12                  | 0                  | 0                    | 0                    | 0         | <b>12</b>                   |
|                           | Errors found                               | 0                   | 0                   | 0                  | 0                    | 0                    | 0         | <b>0</b>                    |
|                           | % error rate<br>(95% confidence intervals) | -                   | 0%                  | -                  | -                    | -                    | -         | <b>0%</b>                   |
| <b>Unknown Prescriber</b> | Items written/omitted                      | 86                  | 63                  | 85                 | 6                    | 26                   | 0         | <b>266</b>                  |
|                           | Errors found                               | 6                   | 6                   | 4                  | 1                    | 4                    | 0         | <b>21</b>                   |
|                           | % error rate<br>(95% confidence intervals) | 7.0%<br>(1.6-12.4%) | 9.5%<br>(2.2-16.8%) | 4.7%<br>(0.2-9.2%) | 16.7%<br>(0.0-49.3%) | 15.4%<br>(1.2-29.5%) | -         | <b>7.9%<br/>(4.6-11.1%)</b> |
| <b>TOTAL</b>              | Items written/omitted                      | <b>863</b>          | <b>1530</b>         | <b>1273</b>        | <b>247</b>           | <b>495</b>           | <b>19</b> | <b>4427</b>                 |
|                           | Errors found                               | <b>92</b>           | <b>100</b>          | <b>46</b>          | <b>11</b>            | <b>32</b>            | <b>0</b>  | <b>281</b>                  |

| PRESCRIBER | DESCRIPTION                                | PRESCRIBING STAGE                  |                                  |                                  |                                  |                                  |           | TOTAL                            |
|------------|--------------------------------------------|------------------------------------|----------------------------------|----------------------------------|----------------------------------|----------------------------------|-----------|----------------------------------|
|            |                                            | On admission                       | During stay                      | Rewritten                        | Leave                            | Discharge                        | Unknown   |                                  |
|            | % error rate<br>(95% confidence intervals) | <b>10.7%</b><br><b>(8.6-12.7%)</b> | <b>6.5%</b><br><b>(5.3-7.8%)</b> | <b>3.6%</b><br><b>(2.6-4.6%)</b> | <b>4.5%</b><br><b>(1.9-7.0%)</b> | <b>6.5%</b><br><b>(4.3-8.6%)</b> | <b>0%</b> | <b>6.3%</b><br><b>(5.6-7.1%)</b> |

\* The Foundation Year (FY) programme corresponds to the first two years of medical training for junior doctors after completion of their undergraduate degree, and is similar to internships or residencies in other countries.

\*\* Speciality trainees include General Practitioner trainee (GPST1-3) and psychiatry trainee (CT1-2 and ST4-6) medical grades; FY = Foundation Year

### Nature of PEs identified

The vast majority of identified PEs were associated with the oral route of administration (n=216, 75%) and medicines belonging to the central nervous system class (n=165, 57.3%).

The most common types of PEs were medicines omitted on admission to hospital (n=36, 12.5%), followed by administration times/frequencies that were incorrect or missing (n=33, 11.5%), missing strengths or doses (n=30, 10.4%) and prescribing incorrect drug formulations (n=26, 9.0%). Other common PE subtypes included failing to sign a prescription (n=24), incorrect or missing start dates for prescriptions (n=21) and under-dosing (n=20). Table 2 shows the frequency of all PE subtypes. After review by the multidisciplinary panel, 162 (56.3%) PEs were considered clinically relevant for patients. No PEs were reported by pharmacists to cause actual patient harm. These findings are summarised in Table 3 and a summary of all potentially serious and life-threatening errors is provided in Table 4.

Half of the 20 potentially serious or life threatening PEs involved central nervous system medicines, with the remaining 10 including cardiovascular system (n=5), endocrine system (n=4, all insulin) and anti-infective therapies (n=1). These error types occurred more commonly in female patients (n=14) and most frequently involved clinical contraindications (n=6), omission on admission (n=5) and missing strengths or doses (n=4); 3 female patients accumulated 11 of these errors, with one affected by 4 clinical contraindications, another with 4 with missing strengths/doses and the final patient with 3 drugs omitted on admission. In contrast, 25% of all potentially serious or life-threatening PEs involved injectable administration routes (subcutaneous route (n=4) or intramuscular (n=1) compared with total of 20/288 (6.9%) overall).

**Table 2: Types of prescribing errors**

| Type of prescribing error         | Subtypes                                           | Frequency (%) |
|-----------------------------------|----------------------------------------------------|---------------|
| <b>Need for drug</b>              | Omission on admission                              | 36 (12.5)     |
|                                   | Omission of discharge/leave prescription           | 14 (4.9)      |
|                                   | Duplication                                        | 13 (4.5)      |
|                                   | Continuation for longer than needed                | 10 (3.5)      |
|                                   | Omission on rewritten prescription                 | 3 (1.0)       |
|                                   | Drug not prescribed but indicated                  | 1 (0.3)       |
|                                   | No indication                                      | 1 (0.3)       |
|                                   | Premature discontinuation                          | 0             |
| <b>Selection of specific drug</b> | Clinical contra-indication                         | 9 (3.1)       |
|                                   | Unintentional prescription of drug                 | 2 (0.7)       |
|                                   | Continuation after adverse drug reaction           | 0             |
|                                   | Drug interaction                                   | 0             |
|                                   | Significant allergy                                | 0             |
| <b>Select dosage regimen</b>      | Underdose                                          | 20 (6.9)      |
|                                   | Overdose                                           | 12 (4.2)      |
|                                   | No maximum dose                                    | 5 (1.7)       |
|                                   | Drug interaction not taken into account            | 1 (0.3)       |
|                                   | Dose / rate mismatch                               | 0             |
|                                   | No dosage alteration after levels out of range     | 0             |
|                                   | Daily dose divided incorrectly                     | 0             |
| <b>Administration of drug</b>     | Administration times/frequencies incorrect/missing | 34 (11.8)     |
|                                   | Incorrect formulation                              | 26 (9.0)      |
|                                   | Start date incorrect/missing                       | 21 (7.3)      |
|                                   | Intramuscular instructions incorrect/missing       | 0             |
|                                   | Incorrect route                                    | 0             |
| <b>Provide drug product</b>       | Strength/dose missing                              | 30 (10.4)     |
|                                   | No signature                                       | 24 (8.3)      |
|                                   | Product/formulation not specified                  | 17 (5.9)      |

1  
2  
3  
4  
5  
6  
7  
8  
9  
10  
11  
12  
13  
14  
15  
16  
17  
18  
19  
20  
21  
22  
23  
24  
25  
26  
27  
28  
29  
30  
31  
32  
33  
34  
35  
36  
37  
38  
39  
40  
41  
42  
43  
44  
45  
46  
47  
48  
49  
50  
51  
52  
53  
54  
55  
56  
57  
58  
59  
60

| Type of prescribing error | Subtypes                                                                     | Frequency (%) |
|---------------------------|------------------------------------------------------------------------------|---------------|
|                           | Prescribed medication not in accordance with Mental Health Act documentation | 4 (1.4)       |
|                           | Route missing                                                                | 3 (1.0)       |
|                           | Controlled drug requirements incorrect/missing                               | 1 (0.3)       |
|                           | Prescription initiated before registration with monitoring service           | 1 (0.3)       |

---

For peer review only

**Table 3: Severity ratings for identified PEs following multidisciplinary review**

| Potential severity criteria            |                  | Examples                                                                                                                                                                                                                                                        | Frequency (%) |
|----------------------------------------|------------------|-----------------------------------------------------------------------------------------------------------------------------------------------------------------------------------------------------------------------------------------------------------------|---------------|
| Not clinically relevant                | Minor            | Prescription not signed.<br>No start date on prescription.                                                                                                                                                                                                      | 126 (43.8)    |
|                                        | Significant      | The dose of the drug is too low for a patient with the condition being treated.<br>The wrong route of administration for the condition being treated is ordered e.g. intramuscular depot is prescribed for subcutaneous administration.                         | 142 (49.3)    |
| Clinically relevant prescribing errors | Serious          | The dose of the drug would result in serum drug levels in the toxic range, e.g. lithium levels 1-2 mmol/L.<br>The drug orders could exacerbate the patient's condition, e.g. drug-drug interaction or drug-disease interaction.                                 | 19 (6.6)      |
|                                        | Life-threatening | The drug prescribed has a high potential to cause a life threatening adverse reaction, such as anaphylaxis, in light of the patient's medical history.<br>The dose of a potentially life-saving drug is too low for a patient having the disease being treated. | 1 (0.3)       |

**Table 4: Descriptions of potentially serious and life-threatening prescribing errors**

| Severity                     | Patient age | Patient sex | Medication               | Daily dose (intended) | Indication           | Route of administration | Error description                                                                                                                                                                                                                                                                                    |
|------------------------------|-------------|-------------|--------------------------|-----------------------|----------------------|-------------------------|------------------------------------------------------------------------------------------------------------------------------------------------------------------------------------------------------------------------------------------------------------------------------------------------------|
| Potentially life threatening | 46          | Male        | Zuclopenthixol Decanoate | 300mg weekly          | Schizophrenia        | Intramuscular           | Clinical Contraindication:<br>Patient prescribed this medication after previous prolonged QTc whilst taking olanzapine (no QTc values provided). After olanzapine stopped and zuclopenthixol started, no further ECG taken despite receiving two doses of depot (one of which was an increased dose) |
| Potentially serious          | 76          | Female      | Moxonidine               | 400 micrograms        | Hypertension         | Oral                    | Clinical contraindication:<br>Medication continued on rewritten prescription despite very low blood pressure recorded.                                                                                                                                                                               |
|                              |             |             | Bisoprolol               | 5mg                   | Hypertension         | Oral                    | As above – same patient                                                                                                                                                                                                                                                                              |
|                              |             |             | Lisinopril               | 10mg                  | Hypertension         | Oral                    | As above – same patient                                                                                                                                                                                                                                                                              |
|                              |             |             | Doxazosin                | 16mg                  | Hypertension         | Oral                    | As above – same patient                                                                                                                                                                                                                                                                              |
| Potentially serious          | 26          | Female      | Quetiapine               | 450mg                 | Personality disorder | Oral                    | Omission on admission:<br>Medicine not prescribed upon inpatient admission                                                                                                                                                                                                                           |
|                              |             |             | Diazepam                 | 15mg                  | Personality disorder | Oral                    | As above – same patient – doses missed                                                                                                                                                                                                                                                               |
|                              |             |             | Mirtazapine              | 45mg                  | Personality disorder | Oral                    | As above – same patient – doses missed                                                                                                                                                                                                                                                               |
| Potentially serious          | 48          | Female      | Novorapid insulin        | 6 units AM            | Diabetes             | Subcutaneous            | Dose/strength missing:<br>Insulin dose prescribed as ‘U’ instead of ‘Units’ which could have been mistaken for 0 i.e. 10 fold error                                                                                                                                                                  |



| Severity            | Patient age | Patient sex | Medication        | Daily dose (intended) | Indication                         | Route of administration | Error description                                                                                   |
|---------------------|-------------|-------------|-------------------|-----------------------|------------------------------------|-------------------------|-----------------------------------------------------------------------------------------------------|
|                     |             |             | Novorapid insulin | 4 units PM            | Diabetes                           | Subcutaneous            | As above – same patient                                                                             |
|                     |             |             | Novorapid insulin | 6 units PM            | Diabetes                           | Subcutaneous            | As above – same patient                                                                             |
|                     |             |             | Novorapid insulin | 4 units PRN           | Diabetes                           | Subcutaneous            | As above – same patient                                                                             |
| Potentially serious | 78          | Female      | Haloperidol       | 4mg                   | Psychotic depression               | Oral                    | Under-dose:<br>Dose prescribed on admission as 500 micrograms twice daily – only 25% of normal dose |
| Potentially serious | 32          | Female      | Sodium valproate  | 500mg                 | Epilepsy                           | Oral                    | Omission on admission:<br>Medication not prescribed on admission – dose missed                      |
| Potentially serious | 32          | Male        | Enalapril         | 20mg                  | Hypertension                       | Oral                    | Overdose:<br>Prescribed as 200mg daily on admission – 10 times overdose                             |
| Potentially serious | Unknown     | Male        | Co-trimoxazole    | 960mg                 | Pneumocystis pneumonia prophylaxis | Oral                    | Omission on admission:<br>Failure to prescribe on admission to hospital                             |
| Potentially serious | 79          | Male        | Risperidone       | 3mg                   | Psychosis                          | Oral                    | Duplication:<br>Dose increased from 1mg twice daily to 1.5mg twice                                  |

1  
2  
3  
4  
5  
6  
7  
8  
9  
10  
11  
12  
13  
14  
15  
16  
17  
18  
19  
20  
21  
22  
23  
24  
25  
26  
27  
28  
29  
30  
31  
32  
33  
34  
35  
36  
37  
38  
39  
40  
41  
42  
43  
44  
45  
46  
47  
48  
49

| Severity            | Patient age | Patient sex | Medication          | Daily dose (intended) | Indication | Route of administration | Error description                                                                                                                        |
|---------------------|-------------|-------------|---------------------|-----------------------|------------|-------------------------|------------------------------------------------------------------------------------------------------------------------------------------|
|                     |             |             |                     |                       |            |                         | daily, but old entry not cancelled.                                                                                                      |
| Potentially serious | 44          | Male        | Citalopram          | 30mg                  | Depression | Oral                    | Omission on discharge/leave prescription:<br>Omitted from discharge prescription                                                         |
| Potentially serious | Unknown     | Female      | Clozapine           | Titration             | Psychosis  | Oral                    | Clinical contra-indication: despite efforts to slow pace of clozapine dose escalation (due to tachycardia), dose increased by 50mg daily |
| Potentially serious | 34          | Male        | Sodium valproate MR | 1700mg                | Siezuers   | Oral                    | Under dose:<br>On admission, missed off 700mg morning dose                                                                               |

review only

### Predictors of PEs

Multivariate logistic regression analysis found that specialist trainee registrars (OR 1.23, 95% CI 1.01-1.51) and staff grade psychiatrists (OR 1.50 (1.05-2.13)) were more likely to make PEs than more junior foundation year 1 doctors (FY1) when controlling for prescribing stage, electronic discharge prescriptions and when clustered for study site (as shown in Table 5).

When compared to items written or omitted during the patients stay, prescribers were less likely to make PEs when medication charts were rewritten or when patients were discharged home (OR 0.52 (0.33-0.82) and 0.87 (0.79-0.97) respectively). Newly written or omitted items on admission showed no differences in risk of PEs (OR 1.81 (0.51-6.37)) nor did items written or omitted for patient leave (OR 0.66 (0.39-1.11)) when compared to those screened during patient stay. No difference in risk of PE was observed when discharge prescriptions written on a standard electronic pro-forma were compared to handwritten counterparts (OR 1.30 (0.72-2.35)).

### Predictors of clinically relevant PEs

As shown in Table 5, multivariate logistic regression analysis revealed that more experienced medical staff were more likely to make a clinically relevant PE than their junior counterparts (FY1), with speciality trainee registrars (General Practitioner or psychiatry) and consultant psychiatrists being twice as likely to do so (OR 2.61 (2.11-3.22) and 2.03 (1.66-2.50) respectively).

Patient admission and discharge were associated with a significantly increased risk of making a potentially clinically relevant PE when compared with during stay (OR 5.39 (2.72-10.69) and 4.23 (3.68-4.87) respectively), with the process of rewriting prescriptions also at

1  
2  
3 significantly higher risk (OR 2.27 (1.72-2.99)). No difference in risk was observed when  
4  
5 leave prescriptions were compared to those written during patient stay.  
6  
7

8 When compared against those errors associated with the 'need for drug' PE subcategory, the  
9  
10 groups 'select dosage regimen', 'administration of drug' and 'provide drug product' were  
11  
12 associated with a lower risk of potentially clinically relevant PEs (OR 0.44 (0.20-0.97), 0.17  
13  
14 (0.09-0.32), 0.04 (0.02-0.12) respectively). The latter two groups in particular were  
15  
16 associated with much lower risks; PE types included in these groups were mostly clerical in  
17  
18 origin (e.g., missing prescriber signature, see Table 2).  
19  
20  
21

22 Neither prescriptions written on a standard electronic pro-forma (OR 0.92 (0.38-2.22)) nor  
23  
24 the central nervous system medication class (OR 0.71 (0.34-1.49)) were associated with an  
25  
26 increased likelihood of clinically relevant PEs when compared to minor errors.  
27  
28  
29  
30  
31  
32  
33  
34  
35  
36  
37  
38  
39  
40  
41  
42  
43  
44  
45  
46  
47  
48  
49  
50  
51  
52  
53  
54  
55  
56  
57  
58  
59  
60

**Table 5: Predictors of (a) error likelihood and (b) potential error severity: multivariate logistic models**

| FACTOR                              |                            | ODDS OF PRESCRIBING ERROR COMPARED TO NO ERROR |                    | ODDS OF CLINICALLY RELEVANT PRESCRIBING ERROR RATHER THAN A MINOR ERROR* |                     |
|-------------------------------------|----------------------------|------------------------------------------------|--------------------|--------------------------------------------------------------------------|---------------------|
|                                     |                            | Odds ratio (OR)                                | 95% CI             | Odds ratio (OR)                                                          | 95% CI              |
| Prescriber                          | FY1                        | Reference                                      |                    | Reference                                                                |                     |
|                                     | FY2                        | 0.96                                           | 0.84 – 1.11        | 1.83                                                                     | 0.77 – 4.38         |
|                                     | Speciality Trainee **      | <b>1.23</b>                                    | <b>1.01 – 1.51</b> | <b>2.61</b>                                                              | <b>2.11 – 3.22</b>  |
|                                     | Staff Grade Psychiatrist   | <b>1.50</b>                                    | <b>1.05 – 2.13</b> | 2.88                                                                     | 0.70 – 11.83        |
|                                     | Consultant Psychiatrist    | 1.18                                           | 0.71 – 1.95        | <b>2.03</b>                                                              | <b>1.66 – 2.50</b>  |
| Prescribing stage                   | During stay                | Reference                                      |                    | Reference                                                                |                     |
|                                     | Admission                  | 1.81                                           | 0.51 – 6.37        | <b>5.39</b>                                                              | <b>2.72 – 10.69</b> |
|                                     | Re-written item            | <b>0.52</b>                                    | <b>0.33 – 0.82</b> | <b>2.27</b>                                                              | <b>1.72 – 2.99</b>  |
|                                     | Leave                      | 0.66                                           | 0.39 – 1.11        | 2.57                                                                     | 0.74 – 8.95         |
|                                     | Discharge                  | <b>0.87</b>                                    | <b>0.79 – 0.97</b> | <b>4.23</b>                                                              | <b>3.68 – 4.87</b>  |
| Electronic discharge pro-forma item | No                         | Reference                                      |                    | Reference                                                                |                     |
|                                     | Yes                        | 1.30                                           | 0.72 – 2.35        | 0.92                                                                     | 0.38 – 2.22         |
| Medication class †                  | All others                 | -                                              | -                  | Reference                                                                |                     |
|                                     | Central Nervous System     | -                                              | -                  | 0.71                                                                     | 0.34 – 1.49         |
| Prescribing error subcategories *** | Need for drug              | -                                              | -                  | Reference                                                                |                     |
|                                     | Selection of specific drug | -                                              | -                  | 2.36                                                                     | 0.23 – 24.48        |
|                                     | Select dosage regimen      | -                                              | -                  | <b>0.44</b>                                                              | <b>0.20 – 0.97</b>  |
|                                     | Administration of drug     | -                                              | -                  | <b>0.17</b>                                                              | <b>0.09 – 0.32</b>  |
|                                     | Provide drug product       | -                                              | -                  | <b>0.04</b>                                                              | <b>0.02 – 0.12</b>  |
| Pseudo R squared values             |                            | <b>0.02</b>                                    |                    | <b>0.28</b>                                                              |                     |

| FACTOR | ODDS OF PRESCRIBING ERROR COMPARED TO NO ERROR |        | ODDS OF CLINICALLY RELEVANT PRESCRIBING ERROR RATHER THAN A MINOR ERROR* |        |
|--------|------------------------------------------------|--------|--------------------------------------------------------------------------|--------|
|        | Odds ratio (OR)                                | 95% CI | Odds ratio (OR)                                                          | 95% CI |

FY = Foundation Year; \* Potentially clinically relevant PEs (either significant, serious or life-threatening) vs. minor errors; \*\* Speciality trainees include GPST1-3, CT1-2 and ST4-6 medical grades; \*\*\* see table 2 for a list of PE subcategories; † = no odds ratio for risk of at least one PE as no denominator data collected for medication classes

For peer review only

## DISCUSSION

### Main findings

This is the first study to prospectively identify the prevalence, nature and predictors of inpatient prescribing errors in mental health hospitals for only newly written or omitted prescription items, finding an overall rate of 6.3% (95% CI 5.6-7.1%). Most of the PEs identified related to omissions of drugs on admission to or discharge from hospital as well as missing or incorrect prescription requirements (e.g. dose, frequency, signatures, formulations). Over half (56%) of all 288 errors identified were considered to be clinically relevant with the potential to cause patient harm, with 20 (6.9%) being graded as potentially serious or life-threatening. Speciality trainees and staff grade psychiatrists were more likely to make a PE, with speciality trainees and consultants more likely to make a potentially clinically relevant PE. Rewritten and discharge prescription items were significantly less likely to contain a PE than those written during patient stay, but were found to be at higher risk of potentially clinically relevant errors (especially on admission and discharge, where the risk was 5 and 4 times that of during stay, respectively). PE subtypes including prescription writing errors were associated with significantly lower risks of potentially clinically relevant PEs when compared to groups which included omitted and duplicated drugs. Electronic prescribing at discharge using a template and the 'central nervous system' drug class (which contains all psychotropic medicines) were found not to be associated with an increased risk of clinically relevant PEs.

### Implications of findings

Our overall PE rate of 6.3% is higher than the 2.2%<sup>[18]</sup> and 2.4%<sup>[22]</sup> previously reported in UK psychiatric hospitals using prospective medication chart review, and similar to a median

1  
2  
3 rate of 7 per 100 medication orders reported in general hospitals worldwide.<sup>[2]</sup> However,  
4  
5 differences in the type of prescription items that were assessed (i.e. we included only newly  
6  
7 omitted and written items), the data collection periods (4 days<sup>[18]</sup> or 5 days<sup>[22]</sup> versus 10 in  
8  
9 this study), severity assessments, study settings and year of publication preclude more direct  
10  
11 comparisons.<sup>[2,34]</sup> Recent UK based general hospital PE investigations using similar  
12  
13 methodology as this study reported higher PE rates,<sup>[7,8]</sup> which may reflect different patient  
14  
15 complexities, the working environment, the medicines used (e.g. intravenous medicines are  
16  
17 rarely used in psychiatry) and the predominant focus on mental health rather than physical  
18  
19 health in psychiatry settings. In contrast, retrospective reviews of case notes / medication  
20  
21 charts to identify PEs in psychiatry<sup>[25]</sup> yields higher error rates of 15% of error opportunities  
22  
23 although the denominator and setting of this study was different to ours.  
24  
25  
26

27  
28 The finding that a sizeable proportion of PEs concerned dosing errors or incomplete  
29  
30 prescription items has been noted in other studies of PEs in psychiatry,<sup>[18,20,22]</sup> and in general  
31  
32 hospitals.<sup>[2,7-9]</sup> However, whilst studies in general hospitals also found that the omission of  
33  
34 drugs on admission/discharge/rewritten prescriptions were a leading PE subtype,<sup>[2,7-9]</sup>  
35  
36 previous studies in psychiatry did not.<sup>[18,20,22]</sup> Omission of drugs on patient transfer may arise  
37  
38 due to inadequate communication of drug information<sup>[8,35]</sup> an issue which may affect mental  
39  
40 health settings more acutely given the increasing number of community services creating  
41  
42 more care transfer interfaces.<sup>[13,36,37]</sup> One UK study found that 69% and 43% of hospital  
43  
44 admission and post-discharge medicines were affected by a medication discrepancy,  
45  
46 respectively<sup>[17]</sup> and more recently studies found 56.2% of hospital admissions (UK based)<sup>[38]</sup>  
47  
48 and 23.3% of discharges (USA based)<sup>[39]</sup> were affected, with the most common types being  
49  
50 drug omissions. These studies highlight the importance of medicines reconciliation, a practice  
51  
52  
53  
54  
55  
56  
57  
58  
59  
60



1  
2  
3 which is established in UK mental health hospitals<sup>[40]</sup> and which has shown value across  
4  
5 hospital settings.<sup>[38,40-42]</sup>  
6  
7

8  
9 Despite the prevalence of drug omission errors during care transfer the patient admission  
10 stage was not associated with significantly higher PE rates than during patient stay in this  
11 study, with the re-write and discharge stages associated with a significantly lower risks of  
12 PEs. However, errors occurring on admission, re-write and discharge were more likely to  
13 harm patients (considered as clinically significant errors – potential to cause significant,  
14 serious or life-threatening harm), which could reflect the fact that errors could cause  
15 immediate deterioration in a patients clinical condition and/or go unnoticed for long periods  
16 of time. The clear dangers posed by patient transfer in psychiatry have been recognised  
17 nationally in the UK,<sup>[37,43]</sup> though overall this challenge has received less attention than in  
18 general hospitals.<sup>[13,15,36]</sup> Future research should seek to clarify the frequency, nature and  
19 severity of PEs across and between care interfaces in the mental health setting, as well as  
20 investigating further the impact of medicines reconciliation.  
21  
22  
23  
24  
25  
26  
27  
28  
29  
30  
31  
32  
33  
34

35  
36 This study has indicated that more senior speciality trainees and staff grade psychiatrists are  
37 at a significantly increased risk of making a PE when compared to their FY one colleagues.  
38 This is in contrast to the EQUIP study, which found that junior doctors were more likely to  
39 make PEs.<sup>[7]</sup> The regression analysis also revealed that consultants were at a higher risk of  
40 making potentially clinically relevant PEs, along with speciality trainees when compared to  
41 FY one doctors. Whilst senior doctor prescribing has not been formerly evaluated in  
42 psychiatry in relation to PEs, the bulk of prescribing on admission and discharge (where more  
43 clinically significant errors occurred) was carried out by speciality trainees, which may  
44 explain why this association was found. Consultant prescribing may be more complex and  
45 risky than junior doctor prescribing, with negative perceptions towards prescription re-writes  
46  
47  
48  
49  
50  
51  
52  
53  
54  
55  
56  
57  
58  
59  
60

1  
2  
3 from medical staff noted in research from general hospitals also potentially contributing.<sup>[11]</sup>

4  
5 Future research should investigate in detail the prescribing of more senior clinicians in mental  
6  
7 health, as previous studies making similar comparisons did not do so in the context of total  
8  
9 prescribing burdens using multivariate regression analysis.<sup>[18,22]</sup>

10  
11  
12 This study has emphasised the importance of pharmacy teams in the detection and prevention  
13  
14 of PEs and associated patient harms in mental health hospitals, as seen elsewhere.<sup>[9,18,20,22,25,38]</sup>

15  
16  
17 Given the important contribution of medicines to avoidable harm in hospitals, the input of  
18  
19 pharmacy teams in keeping patients safe should not be underestimated.<sup>[43]</sup>

20  
21  
22 Our analysis did not reveal any difference in the risk of a PE between electronic and hand  
23  
24 written prescriptions, though this should be viewed with caution as the number of  
25  
26 electronically prescribed items in our analysis was low and the nature of this type of  
27  
28 prescribing was limited to discharge prescription templates at one study site (i.e. no  
29  
30 commercially available e-prescribing software was used). Although the benefits of electronic  
31  
32 prescribing software should not be overlooked<sup>[15]</sup> further investigation may be required as  
33  
34 despite important reductions in some errors the wider effects of electronic prescribing  
35  
36 systems on MEs and ADEs is not clear, and in some cases novel PE opportunities may be  
37  
38 created.<sup>[44]</sup>

39  
40  
41  
42  
43 To our knowledge, there have been no published attempts to determine the causes of PEs in  
44  
45 inpatient mental health settings despite growing understanding in general hospitals that these  
46  
47 errors involve multiple, interacting antecedents.<sup>[7,8,10-12]</sup> Although a number of different  
48  
49 interventions designed to reduce PEs have been suggested,<sup>[45]</sup> future research should focus on  
50  
51 determining the causes of PEs in psychiatry using theoretical frameworks such as Reason's  
52  
53 Model of Accident Causation<sup>[46]</sup> as recommended previously.<sup>[13,15,47]</sup> Reason's model has  
54  
55 been used frequently in general hospitals for this purpose,<sup>[7,10-12]</sup> and such investigations

1  
2  
3 would facilitate measurement of the value of remedial interventions in the psychiatry setting.  
4  
5 As a large proportion of care for mental health patients takes place in the community, future  
6  
7 studies of PEs could also be carried out in this setting.<sup>[13,36]</sup>  
8  
9

### 10 **Strengths and limitations**

11  
12  
13 Key strengths of this study are that it used standardised training of data collectors, sought to  
14  
15 compare risk of PEs and clinically relevant errors between prescribers and prescribing stages,  
16  
17 and collected data on only newly written or omitted items over a range of data collection days  
18  
19 so that items were counted only once and the risk of including previously corrected items was  
20  
21 minimised.  
22  
23

24  
25 Although this study was conducted across three sites over a large geographical area,  
26  
27 generalizability may be limited when compared to earlier work.<sup>[22]</sup> Combined medication  
28  
29 chart and case note review may identify a greater number of PEs,<sup>[30]</sup> so our PE rate maybe an  
30  
31 underestimate of the true burden of these errors in mental health hospitals. Whilst data  
32  
33 collectors were trained using standardised materials it is impossible to exclude variation in  
34  
35 error detection due to differing workloads,<sup>[48]</sup> vigilance and/or individual clinical experience  
36  
37 of collectors.<sup>[9,22]</sup> The rate of false positives was minimised by using a multidisciplinary PE  
38  
39 review panel, one senior member of which (SDW) had previously evaluated prescribing  
40  
41 errors in a much larger study.<sup>[7]</sup> We did not record separate PE rate data for core medical  
42  
43 versus general practitioner speciality trainees or psychotropic versus non-psychotropic  
44  
45 medicines, which means that we were unable to compare these different groups.  
46  
47  
48  
49

50  
51 The fact that unknown prescribers were associated with the highest PE rate (7.9% (4.7–  
52  
53 11.1%)) highlights the need to ascertain the identity of prescribers as well as when and where  
54  
55 prescribing took place in order to facilitate optimal patient care and rectify mistakes promptly.  
56  
57  
58  
59  
60

1  
2  
3  
4  
5  
6  
7  
8  
9  
10  
11  
12  
13  
14  
15  
16  
17  
18  
19  
20  
21  
22  
23  
24  
25  
26  
27  
28  
29  
30  
31  
32  
33  
34  
35  
36  
37  
38  
39  
40  
41  
42  
43  
44  
45  
46  
47  
48  
49  
50  
51  
52  
53  
54  
55  
56  
57  
58  
59  
60

Prescriber identification becomes an even more critical issue given the more recent emphasis on the importance of feedback to improve prescribing practice and minimise PEs.<sup>[7,8,45,49]</sup>

For peer review only

## CONCLUSION

Prescribing errors may be more common in mental health hospitals than previously reported, and continue to pose a significant challenge to healthcare providers as the majority have the potential to cause patient harm. This study has identified more senior prescribers and care transfer interfaces as potential targets to investigate the burden of these errors in more detail with the aim of formulating remedial approaches. Future work should focus on using theoretical frameworks such as those of human error to investigate the causes of PEs in order to inform the design of interventions aimed at reducing their burden in the psychiatric inpatient setting.

## Acknowledgements

We would like to thank all the pharmacy teams involved in data collection as well as Yin Kwok, Mayamiko Kaoma and Janette Chu for their assistance with data entry.

## Competing interests

All the authors have no competing interests to declare. This work has not been posted or published elsewhere in its entirety. An abstract summarising the study will soon be published after oral presentation at the Prescribing and Research in Medicines Management (PRIMM) Annual Scientific Meeting 2014 (2<sup>nd</sup> May, London, UK).

## Funding

This research received no specific grant from any funding agency in the public, commercial or not-for-profit sectors. This study was funded by the University of Manchester and participating mental health NHS Trusts. The sponsors had no role in study design, in the collection, analysis and interpretation of data, or in the writing of the report and in the decision to submit the report for publication.

## Contributor statement

Design of study: all authors. Review of study data (expert panel): RNK, JJV, SDW. Analysis of data: RNK, DMA. Preparation of manuscript: RNK. Critical review of manuscript: all authors. Approval of submitted manuscript (current version): all authors.

## Data sharing

No additional data available.

**REFERENCES**

1. de Vries EN, Ramrattan MA, Smorenburg SM, et al. The incidence and nature of in-hospital adverse events: a systematic review. *Qual Saf Health Care* 2008;17(3):216-223.
2. Lewis PJ, Dornan T, Taylor D, et al. Prevalence, incidence and nature of prescribing errors in hospital inpatients: a systematic review. *Drug Saf* 2009;32(5):379-389.
3. Keers RN, Williams SD, Cooke J, et al. Prevalence and nature of medication administration errors in health care settings: A Systematic Review of Direct Observational Evidence. *Ann Pharmacother* 2013;47(2):237-256.
4. Kopp BJ, Erstad BL, Allen ME, et al. Medication errors and adverse drug events in an intensive care unit: direct observation approach for detection. *Crit Care Med* 2006;34(2):415-425.
5. Buckley MS, Erstad BL, Kopp BJ, et al. Direct observation approach for detecting medication errors and adverse drug events in a pediatric intensive care unit. *Pediatr Crit Care Med* 2007;8(2):145-152.
6. Carayon P, Wetterneck TB, Cartmill R, et al. Characterising the complexity of medication safety using a human factors approach: an observational study in two intensive care units. *BMJ Qual Saf* 2014;23(1):56-65.
7. Dornan T, Ashcroft D, Heathfield H, et al. An in depth investigation into causes of prescribing errors by foundation trainees in relation to their medical education. EQUIP study. 2009. Accessed at: [http://www.gmc-uk.org/FINAL\\_Report\\_prevalence\\_and\\_causes\\_of\\_prescribing\\_errors.pdf\\_28935150.pdf](http://www.gmc-uk.org/FINAL_Report_prevalence_and_causes_of_prescribing_errors.pdf_28935150.pdf) (accessed 10/03/2014).
8. Franklin BD, Reynolds M, Shebl NA, et al. Prescribing errors in hospital inpatients: a three-centre study of their prevalence, types and causes. *Postgrad Med J* 2011;87(1033):739-745.
9. Seden K, Kirkham JJ, Kennedy T, et al. Cross-sectional study of prescribing errors in patients admitted to nine hospitals across North West England. *BMJ Open* 2013;3(1):pii: e002036. doi: 10.1136/bmjopen-2012-002036.
10. Tully MP, Ashcroft DM, Dornan T, et al. The causes of and factors associated with prescribing errors in hospital inpatients: a systematic review. *Drug Saf* 2009;32(10):819-836.
11. Ross S, Ryan C, Duncan EM, et al. Perceived causes of prescribing errors by junior doctors in hospital inpatients: a study from the PROTECT programme. *BMJ Qual Saf* 2013;22(2):97-102.
12. Lewis PJ, Ashcroft DM, Dornan T, et al. Exploring the causes of junior doctors' prescribing mistakes: a qualitative study. *Br J Clin Pharmacol* 2014;78(2):310-319.

13. Maidment ID, Lelliott P, Paton C. Medication errors in mental healthcare: a systematic review. *Qual Saf Health Care* 2006;15(6):409-413.
14. Mann K, Rothschild JM, Keohane CA, et al. Adverse drug events and medication errors in psychiatry: methodological issues regarding identification and classification. *World J Biol Psychiatry* 2008;9(1):24-33.
15. Procyshyn RM, Barr AM, Brickell T, et al. Medication errors in psychiatry: a comprehensive review. *CNS Drugs* 2010;24(7):595-609.
16. Nirodi P, Mitchell AJ. The quality of psychotropic drug prescribing in patients in psychiatric units for the elderly. *Aging Ment Health* 2002;6(2):191-196.
17. Morcos S, Francis S-A, Duggan C. Where are the weakest links?: A descriptive study of discrepancies in prescribing between primary and secondary sectors of mental health service provision. *Psychiatric Bull* 2002;26:371-374.
18. Haw C, Stubbs J. Prescribing errors detected by pharmacists at a psychiatric hospital. *Pharmacy In Practice* 2003;10:64-66.
19. Paton C, Gill-Banham S. Prescribing errors in psychiatry. *Psychiatric Bull* 2003;27:208-210.
20. Stubbs J, Haw C, Cahill C. Auditing prescribing errors in a psychiatric hospital. Are pharmacists' interventions effective? *Hosp Pharm* 2004;11:203-206.
21. Maidment ID, Thorn A. A medication error reporting scheme: analysis of the first 12 months. *Psychiatric Bull* 2005;29:298-301.
22. Stubbs J, Haw C, Taylor D. Prescription errors in psychiatry - a multi-centre study. *J Psychopharmacol* 2006;20(4):553-561.
23. Haw C, Cahill C. A computerized system for reporting medication events in psychiatry: The first two years of operation. *J Psychiatr Ment Health Nurs* 2011;18(4):308-315.
24. Grasso BC, Genest R, Yung K, et al. Reducing errors in discharge medication lists by using personal digital assistants. *Psychiatr Serv* 2002;53(10):1325-1326.
25. Grasso BC, Genest R, Jordan CW, et al. Use of chart and record reviews to detect medication errors in a state psychiatric hospital. *Psychiatr Serv* 2003;54(5):677-681.
26. Rothschild JM, Mann K, Keohane CA, et al. Medication safety in a psychiatric hospital. *Gen Hosp Psychiatry* 2007;29(2):156-162.
27. Jayaram G, Doyle D, Steinwachs D, et al. Identifying and reducing medication errors in psychiatry: creating a culture of safety through the use of an adverse event reporting mechanism. *J Psychiatr Pract* 2011;17(2):81-88.

- 1  
2  
3 28. Soerensen AL, Lisby M, Nielsen LP, et al. The medication process in a psychiatric  
4 hospital: are errors a potential threat to patient safety? *Risk Manag Healthc Policy* 2013;6:23-  
5 31.  
6  
7  
8 29. Maidment ID, Haw C, Stubbs J, et al. Medication errors in older people with mental  
9 health problems: a review. *Int J Geriatr Psychiatry* 2008;23(6):564-573.  
10  
11 30. Franklin BD, Birch S, Savage I, et al. Methodological variability in detecting prescribing  
12 errors and consequences for the evaluation of interventions. *Pharmacoepidemiol Drug Saf*  
13 2009;18(11):992-999.  
14  
15 31. Meyer-Masseti C, Cheng CM, Schwappach DL, et al. Systematic review of medication  
16 safety assessment methods. *Am J Health Syst Pharm* 2011;68(3):227-240.  
17  
18 32. Dean B, Barber N, Schachter M. What is a prescribing error? *Qual Health Care*  
19 2000;9(4):232-237.  
20  
21 33. Joint Formulary Committee. *British National Formulary*. 66<sup>th</sup> ed. London: BMJ Group  
22 and Pharmaceutical Press, 2013.  
23  
24 34. Garfield S, Reynolds M, Dermont L, et al. Measuring the severity of prescribing errors: a  
25 systematic review. *Drug Saf* 2013;36(12):1151-1157.  
26  
27 35. Kripalani S, Jackson AT, Schnipper JL, et al. Promoting effective transitions of care at  
28 hospital discharge: a review of key issues for hospitalists. *J Hosp Med* 2007;2(5):314-323.  
29  
30 36. Maidment ID, Parmentier H. Medication error in mental health: implications for primary  
31 care. *Ment Health Fam Med* 2009;6(4):203-207.  
32  
33 37. National Patient Safety Agency. *Safety in doses: improving the use of medicines in the*  
34 *NHS*. 2009. Available at:  
35 [http://www.nrls.npsa.nhs.uk/EasySiteWeb/getresource.axd?AssetID=61626&type=full&servi](http://www.nrls.npsa.nhs.uk/EasySiteWeb/getresource.axd?AssetID=61626&type=full&servicetype=...)  
36 [cetype=...](http://www.nrls.npsa.nhs.uk/EasySiteWeb/getresource.axd?AssetID=61626&type=full&servicetype=...) (accessed 10/03/2014).  
37  
38  
39  
40  
41 38. Brownlie K, Schneider C, Culliford R, et al. Medication reconciliation by a pharmacy  
42 technician in a mental health assessment unit. *Int J Clin Pharm* 2014;36(2):303-309.  
43  
44 39. Nelson LA, Graham MR, Schaefer MG. Characterization of medication discrepancies  
45 occurring at the time of hospital discharge from an adult state psychiatric inpatient facility.  
46 *Hosp Pharm* 2011;46(4):254-261.  
47  
48 40. Paton C, McIntyre S, Bhatti SF, et al. Medicines reconciliation on admission to inpatient  
49 psychiatric care: findings from a UK quality improvement programme. *Ther Adv*  
50 *Psychopharmacol* 2011;1(4):101-110.  
51  
52 41. Mueller SK, Sponsler KC, Kripalani S, et al. Hospital-based medication reconciliation  
53 practices: a systematic review. *Arch Intern Med* 2012;172(14):1057-1069.  
54  
55  
56  
57  
58  
59  
60



- 1  
2  
3 42. Kwan JL, Lo L, Sampson M, et al. Medication reconciliation during transitions of care as  
4 a patient safety strategy: a systematic review. *Ann Intern Med* 2013;158(5 Pt 2):397-403.  
5  
6 43. National Mental Health Development Unit. Getting the Medicines Right: medicines  
7 management in adult and older adult acute mental health wards. 2009. Available at:  
8 <http://www.nmhdu.org.uk/silo/files/getting-the-medicines-right--jul-2009.pdf> (accessed  
9 10/03/2014).  
10  
11 44. Tully MP. Prescribing errors in hospital practice. *Br J Clin Pharmacol* 2012;74(4):668-  
12 675.  
13  
14 45. The Health Foundation. Evidence scan: reducing prescribing errors. 2012. Available at:  
15 <http://www.health.org.uk/public/cms/75/76/313/3337/Reducing%20prescribing%20errors%20-0-%20evidence%20scan.pdf?realName=3bXWvp.pdf> (accessed 10/03/2014).  
16  
17 46. Reason J. *Human Error*. Cambridge: Cambridge University Press, 1990.  
18  
19 47. Maidment I. Medication-related adverse events in older people with dementia; causes and  
20 possible solutions. PhD Thesis: Aston University, 2013.  
21  
22 48. Tully MP, Buchan IE. Prescribing errors during hospital inpatient care: factors  
23 influencing identification by pharmacists. *Pharm World Sci* 2009;31:682-688.  
24  
25 49. Brennan N, Mattick K. A systematic review of educational interventions to change  
26 behaviour of prescribers in hospital settings, with a particular emphasis on new prescribers.  
27 *Brit J Clin Pharmacol* 2013;75(2):359-372.  
28  
29  
30  
31  
32  
33  
34  
35  
36  
37  
38  
39  
40  
41  
42  
43  
44  
45  
46  
47  
48  
49  
50  
51  
52  
53  
54  
55  
56  
57  
58  
59  
60

1  
2  
3 **Prevalence, nature and predictors of prescribing errors in mental health hospitals: a**  
4  
5 **prospective multicentre study**  
6  
7

8 **Running title:** Prescribing errors in mental health hospitals  
9

10  
11 Richard N Keers, Lecturer in Pharmacy Practice ~~and Research Associate~~<sup>1,2</sup>  
12

13 Steven D Williams, Honorary Clinical Lecturer<sup>1</sup> and Consultant Pharmacist in Medicine and  
14 Medication Safety<sup>3</sup>  
15

16  
17 Joe J Vattakatuchery, Lead Consultant Psychiatrist<sup>4</sup> and Honorary Clinical Lecturer<sup>5</sup>  
18

19  
20 Petra Brown, Chief Pharmacist<sup>6</sup>  
21

22  
23 Joan Miller, Deputy Director of Pharmacy<sup>7</sup>  
24

25  
26 Lorraine Prescott, Chief Pharmacist<sup>8</sup>  
27

28  
29 Darren M Ashcroft, Professor of Pharmacoepidemiology<sup>1,2</sup>  
30

31  
32 <sup>1</sup> Centre for Pharmacoepidemiology and Drug Safety Research, Manchester Pharmacy School, Manchester  
Academic Health Sciences Centre (MAHSC), University of Manchester, Manchester, United Kingdom (UK)

33  
34 <sup>2</sup>NIHR Greater Manchester Primary Care Patient Safety Translational Research Centre, MAHSC, University of  
35 Manchester, Manchester, UK.  
36

37  
38 <sup>3</sup>Pharmacy Department, University Hospital of South Manchester NHS Foundation Trust, MAHSC, Manchester  
39

40  
41 <sup>4</sup>Adult Services Warrington, 5 Boroughs Partnership NHS Foundation Trust, Warrington, Cheshire, UK  
42

43  
44 <sup>5</sup>Medical School, University of Liverpool, Liverpool, UK  
45

46  
47 <sup>6</sup>Pharmacy Department, Manchester Mental Health and Social Care Trust, MAHSC, Manchester, UK  
48

49  
50 <sup>7</sup>Pharmacy Department, Greater Manchester West Mental Health NHS Foundation Trust, Salford, UK  
51

52  
53 <sup>8</sup>Medicines Management Team, 5 Boroughs Partnership NHS Foundation Trust, Warrington, Cheshire, UK  
54

55  
56 **Correspondence:** R N Keers Tel: (+44)161 275 2414, Fax: (+44)1612752416,  
57

58  
59 [richard.keers@manchester.ac.uk](mailto:richard.keers@manchester.ac.uk)  
60

**Word count main text:** 3939 / **Abstract word count:** 285

**Keywords:** Medication errors; psychiatry; mental health; hospitals

**Number of tables:** 5 / **Number of figures:** 0

## ABSTRACT

**Objective:** To determine the prevalence, nature and predictors of prescribing errors (PEs) in three mental health hospitals.

**Setting:** Inpatient units in three National Health Service (NHS) mental health hospitals in the North West of England.

**Participants:** Trained clinical pharmacists prospectively recorded the number of PEs in newly written or omitted prescription items screened during their routine work on 10 data collection days. A multidisciplinary panel reviewed PE data using established methods to confirm (a) the presence of a PE, (b) the type of PE and (c) whether errors were clinically relevant and likely to cause harm.

**Primary outcome measures:** Frequency, nature and predictors of PEs.

**Results:** Of 4427 screened prescription items, 281 were found to have one or more PEs (error rate 6.3% (95% CI 5.6–7.1%)). Multivariate analysis revealed that speciality trainees (OR 1.23 (1.01-1.51)) and staff grade psychiatrists (OR 1.50 (1.05-2.13)) were more likely to make PEs when compared to foundation year (FY) one doctors, and that speciality trainees and consultant psychiatrists were twice as likely to make clinically relevant PEs (OR 2.61 (2.11-3.22) and 2.03 (1.66-2.50) respectively) compared to FY one staff. Prescription items screened during prescription chart rewrite (OR 0.52 (0.33-0.82)) or at discharge (OR 0.87 (0.79-0.97)) were less likely to be associated with PEs than items assessed during inpatient stay, although they were more likely to be associated with clinically relevant PEs (OR 2.27 (1.72-2.99) and 4.23 (3.68-4.87) respectively). Prescription items screened at hospital admission were five times more likely (OR 5.39 (2.72-10.69)) to be associated with clinically relevant errors than those screened during patient stay.

1  
2  
3 **Conclusions:** Prescribing errors may be more common in mental health hospitals than  
4  
5 previously reported and important targets to minimise these errors have been identified.  
6  
7  
8  
9

10  
11 **STRENGTHS AND LIMITATIONS OF THIS STUDY**  
12

- 13  
14
- 15 • Using standardised methods, this study has for the first time prospectively determined  
16 the prevalence, nature and predictors of prescribing errors across three mental health  
17 hospitals.  
18  
19
  - 20 • Important potential targets were identified for future research to minimise prescribing  
21 errors in this setting.  
22  
23
  - 24 • Whilst this was a large study, its findings may not be generalizable to inpatient  
25 psychiatric care across the NHS.  
26  
27  
28  
29  
30  
31  
32  
33  
34  
35  
36  
37  
38  
39  
40  
41  
42  
43  
44  
45  
46  
47  
48  
49  
50  
51  
52  
53  
54  
55  
56  
57  
58  
59  
60

## INTRODUCTION

Medication errors (MEs) and their associated adverse drug events (ADEs) continue to pose significant challenges for healthcare systems worldwide.<sup>[1-3]</sup> Errors in drug prescribing and administration appear to be the most common MEs.<sup>[4-6]</sup> In general hospitals prescribing errors (PEs) are estimated to affect between 2% and 15% of medication orders<sup>[2,7-9]</sup> and are thought to arise from multiple, interacting causes.<sup>[8,10-12]</sup>

Despite much research activity attempting to understand the frequency, causes and preventive strategies for MEs in general hospital settings, mental health hospitals have been given much less attention.<sup>[2,13-15]</sup> Published studies of PEs (and/or related ADEs) originate from the United Kingdom (UK),<sup>[9,16-23]</sup> United States of America (USA)<sup>[24-27]</sup> and Denmark.<sup>[28]</sup> In common with reviews of general hospital studies,<sup>[2]</sup> differences in study methods, settings and definitions preclude synthesis of PE data from relevant studies to gain an overall measure of their impact.<sup>[13,15,29]</sup>

Not surprisingly, different ME/ADE identification methods influence the outcome rate.<sup>[2,14,30]</sup>

It is accepted that voluntary self-reporting methods such as incident reports grossly underestimate the numbers of MEs that occur when compared to chart review and other detection methods,<sup>[30,31]</sup> which may make subsequent error rates unrepresentative of the practice environment. A number of PE studies carried out in mental health utilised incident/self-reports<sup>[21,23]</sup> with others using retrospective medication chart review (with or without incident reports / case note review / direct observation).<sup>[16,17,24,25,28]</sup> Prospective identification of PEs in UK psychiatry has most commonly involved pharmacists checking prescription charts over different time periods,<sup>[9,18-20,22]</sup> yielding error rates of 2.2%<sup>[18]</sup> and 2.4%<sup>[22]</sup> of prescription items checked (two studies did not provide a denominator<sup>[19,20]</sup>) and

1  
2  
3 31.3% of whole prescriptions checked.<sup>[9]</sup> Between 42.1% and 65% of PEs are administered to  
4  
5 patients before correction by the pharmacist.<sup>[18,20,22]</sup>  
6  
7

8 To our knowledge, no studies have utilised prospective screening of only newly written or  
9  
10 omitted prescription items by pharmacists in psychiatry inpatients to find PEs, as seen in  
11  
12 general hospitals.<sup>[7,8]</sup> This design may reduce the possibility of underestimating PE rates if  
13  
14 errors which have previously been checked and corrected by healthcare staff prior to  
15  
16 examination by data collectors are included.<sup>[9,18,20,22]</sup> In addition, previous studies in  
17  
18 psychiatry have not investigated the differences in PE rates or severity between different  
19  
20 prescribers and prescribing stages.<sup>[18,20,22]</sup> This study aimed to determine the prevalence,  
21  
22 nature and predictors of inpatient prescribing errors in UK mental health settings.  
23  
24  
25  
26  
27  
28  
29  
30  
31  
32  
33  
34  
35  
36  
37  
38  
39  
40  
41  
42  
43  
44  
45  
46  
47  
48  
49  
50  
51  
52  
53  
54  
55  
56  
57  
58  
59  
60

## METHOD

### Settings

Three mental health NHS trusts based in the North West of England took part in the study, including more than 50 inpatient wards across more than 10 hospitals and other smaller facilities. Each trust provided a range of inpatient and community services. On weekdays, clinical pharmacists checked inpatient paper prescription charts written on admission, during patient stay, upon chart re-write (charts were rewritten by prescribers once administration records were complete), on paper leave prescriptions (prescriptions used by patients who could leave the ward temporarily, e.g. for a home visit) and on paper discharge prescriptions. Medication lists were reconciled on admission predominantly by pharmacy teams using sources that included the patient, their General Practitioner (GP) records and any medication brought into hospital. One study site used an electronic prescription pro-forma at discharge. Medications were administered by registered nurses or by patients using self-administration. Pharmacist prescription chart review involved confirming the clarity, completeness and clinical appropriateness of each prescribed item, and occurred daily on some wards (e.g. acute adult units) but less frequently on others (e.g. long stay forensic units). Where necessary, patients' medical notes were accessed as part of the pharmacists' assessment of prescribing safety. All inpatient units visited by pharmacists on data collection days were included in the study. Outpatient prescriptions were excluded.

### Definitions

The definition of a PE used in this study has been used extensively in prescribing error research.<sup>[2,7-9,18,20,22]</sup> 'A clinically meaningful prescribing error occurs when, as a result of a prescribing decision or prescription-writing process, there is an unintentional significant

1  
2  
3 reduction in the probability of treatment being timely and effective, or an increase in the risk  
4  
5 of harm when compared with generally accepted practice.<sup>132]</sup> This definition was  
6  
7 accompanied by a list of situations that should be included and excluded as PEs. However, as  
8  
9 the mental health environment differs from typical hospital settings upon which this  
10  
11 definition was based, we extended its scope to include the following scenarios based on  
12  
13 earlier work:<sup>18,20,22]</sup> (a) prescribing a drug without first registering a patient with the  
14  
15 appropriate monitoring service (e.g. Clozapine Patient Monitoring Service (CPMS)) and (b)  
16  
17 prescribing a drug to treat mental health illness without authorisation from a Mental Health  
18  
19 Act form (e.g. form T2/T3, Advance Decision).  
20  
21  
22

### 23 **Data collection**

24  
25  
26 The process of recording inpatient prescribing errors was based on the UK EQUIP study.<sup>17]</sup>  
27  
28 Twenty nine clinical pharmacists employed across the study sites identified PEs for all newly  
29  
30 prescribed/written or omitted items as part of their routine clinical practice in this setting  
31  
32 during a total of 10 data collection days individually selected between January – April 2013.  
33  
34 Omitted items were identified after reconciliation on admission or after comparison with  
35  
36 earlier inpatient prescribing documentation, and their inclusion in the denominator ensured  
37  
38 that pharmacists were able to determine whether items were omitted for a valid clinical  
39  
40 reason before recording them as a PE. One data collection day per week was purposively  
41  
42 chosen to ensure coverage of all weekdays at least once according to local capacity, with a  
43  
44 complete day including the period from 5pm on the previous day until 5pm on the assigned  
45  
46 data collection day. On Mondays, this period was extended to include prescriptions written  
47  
48 from 5pm the previous Friday throughout the weekend.  
49  
50  
51  
52

53  
54 Data on the number of newly prescribed or omitted items and the corresponding number of  
55  
56 errors were entered onto two standardised forms by pharmacists based on earlier work<sup>17]</sup> and  
57  
58  
59  
60



1  
2  
3 underwent piloting at one participating site in December 2012. Newly prescribed orders  
4 included once only and when required items. Completion of these forms was for research  
5 purposes and was outside the pharmacists' normal duties, though time taken on this task was  
6 reported to be insignificant during pilot testing. For each prescribing error recorded,  
7 pharmacists were asked to record patient information, prescriber grade, stage of patient stay,  
8 a potential severity rating (including whether or not the error caused actual patient harm)  
9 along with details as to the nature of the PE. Each item checked could be associated with  
10 more than one prescribing error.  
11  
12  
13  
14  
15  
16  
17  
18  
19  
20

21 Pharmacist study co-ordinators based at each site used the same materials to provide training  
22 for participating pharmacists which also included question and answer sessions. A  
23 standardised guidebook (including definitions of PEs and potential severity assessment  
24 categories) was made available to data collectors for use at any point during the study and co-  
25 ordinators made regular contact with data collectors to answer any questions raised.  
26  
27  
28  
29  
30  
31  
32

### 33 **Error validation**

34  
35  
36 Validation of all recorded PEs was undertaken by a multidisciplinary panel which comprised  
37 one mental health clinical pharmacist (RNK), one consultant pharmacist in medicine and  
38 medication safety (SDW) and one consultant psychiatrist (JJV). The errors were reviewed  
39 and consensus was reached on (a) whether a genuine prescribing error had occurred, (b) type  
40 of error and (c) the potential severity of the error using established criteria.<sup>[7]</sup> PEs that were  
41 rated as either potentially clinically significant, serious or life-threatening were considered  
42 clinically relevant for patients.  
43  
44  
45  
46  
47  
48  
49  
50  
51

### 52 **Data analysis**

1  
2  
3 Descriptive statistics were used to analyse frequency of error categories by prescriber grade  
4 and prescribing stage, with additional investigations into the nature of PEs identified (route,  
5 severity, type, drug class). Error rates were calculated as a percentage to measure the  
6 prevalence of PEs by dividing the number of newly written or omitted prescription items with  
7 at least one PE by the total number of these items screened and multiplying the answer by  
8 100. Error rates were presented with corresponding 95% confidence intervals (CI).

9  
10  
11  
12  
13  
14  
15  
16  
17 Logistic regression analyses were undertaken to examine (a) predictors of prescribing errors,  
18 and (b) predictors of a clinically relevant error (potentially significant, serious or life-  
19 threatening) compared to a minor error across different prescribers, prescribing stages, and  
20 written vs. electronic discharge pro-forma prescribing. Analysis of potential error severity  
21 also involved comparing errors occurring within the central nervous system class of  
22 medicines (which includes all psychotropic medicines) versus all other medication classes,<sup>[33]</sup>  
23 and comparing different subtypes of PEs that occurred. All logistic regression models were  
24 adjusted for clustering at study site and results presented as adjusted odds ratios (OR) and  
25 95% Confidence Intervals (CI). All calculations were undertaken using STATA V12®, and  
26  $p < 0.05$  was used to indicate statistical significance.

## 27 28 29 30 31 32 33 34 35 36 37 38 39 40 **Ethics**

41  
42  
43 This study was granted ethical approval by the University of Manchester Research Ethics  
44 Committee (12342) and approval was obtained by the Research and Development/Audit  
45 Departments from each participating study site. Individual patient consent was not required  
46 for this service evaluation.

## RESULTS

During the study period 4427 newly written or omitted prescription items were assessed by study pharmacists across the three study sites. A total of 367 PEs were recorded, 79 of which were excluded during review by the expert panel. Good agreement was observed between panel members when reviewing errors, with the most common reason for exclusion at this stage being minor prescription writing incidents such as trivial spelling mistakes, missing information on prescriptions for use when required (e.g. no indication, no minimum dosage interval) or writing medication names without using capital letters.

After review by the expert panel, 281 newly prescribed or omitted items were found to be affected by 1 or more PEs, giving an error rate of 6.3% (95% CI 5.6-7.1%). Seven prescription items were affected by 2 PEs, giving a total of 288 detected errors. Table 1 displays PE rates by prescriber and stage of prescribing.

Orders prescribed on admission to hospital were associated with the highest PE rate (10.7% (95% CI 8.6-12.7%)) when compared to items prescribed during hospital stay (6.5% (5.3-7.8%)) or at discharge (6.5% (4.3-8.6%)). In contrast, items assessed on leave prescriptions (4.5% (1.9-7.0%)) and those that were re-written by prescribers (3.6% (2.6-4.6%)) had lower PE rates. Speciality trainees (general practitioner or psychiatry) were responsible for the majority of newly written or omitted items (52.8%) and had the highest PE rate (6.8% (5.8-7.8%)), after unknown prescribers (7.9% (4.6-11.1%)). Junior FY doctors generally had PE rates lower than their senior colleagues (FY one 5.1% (2.2-8.0%); FY two 4.9% (3.0-6.7%); staff grade 6.5% (4.2-8.7); consultant 5.8% (3.9-7.7%)).

**Table 1: Summary of prescribing errors by prescriber and prescribing stage**

| PRESCRIBER                  | DESCRIPTION                                | PRESCRIBING STAGE   |                     |                     |                     |                     |         | TOTAL                      |
|-----------------------------|--------------------------------------------|---------------------|---------------------|---------------------|---------------------|---------------------|---------|----------------------------|
|                             |                                            | On admission        | During stay         | Rewritten           | Leave               | Discharge           | Unknown |                            |
| <b>FY1*</b>                 | Items written/omitted                      | 28                  | 68                  | 46                  | 17                  | 57                  | 0       | <b>216</b>                 |
|                             | Errors found                               | 1                   | 3                   | 2                   | 0                   | 5                   | 0       | <b>11</b>                  |
|                             | % error rate<br>(95% confidence intervals) | 3.6%<br>(0.0-10.6%) | 4.4%<br>(0.0-9.3%)  | 4.3%<br>(0.0-10.3%) | 0%<br>(N/A)         | 8.8%<br>(1.4-16.2%) | -       | <b>5.1%<br/>(2.2-8.0%)</b> |
| <b>FY2</b>                  | Items written/omitted                      | 95                  | 124                 | 179                 | 79                  | 59                  | 0       | <b>536</b>                 |
|                             | Errors found                               | 5                   | 9                   | 5                   | 5                   | 2                   | 0       | <b>26</b>                  |
|                             | % error rate<br>(95% confidence intervals) | 5.3%<br>(0.7-9.8%)  | 7.3%<br>(2.7-11.8%) | 2.8%<br>(0.4-5.2%)  | 6.3%<br>(0.9-11.7%) | 3.4%<br>(0.0-8.0%)  | -       | <b>4.9%<br/>(3.0-6.7%)</b> |
| <b>Speciality Trainee**</b> | Items written/omitted                      | 582                 | 734                 | 636                 | 114                 | 270                 | 0       | <b>2336</b>                |
|                             | Errors found                               | 67                  | 50                  | 26                  | 3                   | 13                  | 0       | <b>159</b>                 |
|                             | % error rate<br>(95% confidence intervals) | 11.5%               | 6.8%                | 4.1%                | 2.6%                | 4.8%                | -       | <b>6.8%</b>                |

| PRESCRIBER                      | DESCRIPTION                             | PRESCRIBING STAGE  |                 |                 |                   |                   |         | TOTAL                  |
|---------------------------------|-----------------------------------------|--------------------|-----------------|-----------------|-------------------|-------------------|---------|------------------------|
|                                 |                                         | On admission       | During stay     | Rewritten       | Leave             | Discharge         | Unknown |                        |
|                                 | intervals)                              | (8.9-14.1%)        | (5.0-8.6%)      | (2.5-5.6%)      | (0.0-5.6%)        | (2.3-7.4%)        |         | (5.8-7.8%)             |
| <b>Staff Grade Psychiatrist</b> | Items written/omitted                   | 42                 | 148             | 203             | 18                | 38                | 16      | <b>465</b>             |
|                                 | Errors found                            | 10                 | 9               | 5               | 2                 | 4                 | 0       | <b>30</b>              |
|                                 | % error rate (95% confidence intervals) | 23.8% (10.8-36.9%) | 6.1% (2.2-9.9%) | 2.5% (0.3-4.6%) | 11.1% (0.0-26.1%) | 10.5% (0.6-20.4%) | 0%      | <b>6.5% (4.2-8.7%)</b> |
| <b>Consultant Psychiatrist</b>  | Items written/omitted                   | 30                 | 378             | 124             | 13                | 38                | 3       | <b>586</b>             |
|                                 | Errors found                            | 3                  | 23              | 4               | 0                 | 4                 | 0       | <b>34</b>              |
|                                 | % error rate (95% confidence intervals) | 10.0% (0.0-20.9%)  | 6.1% (3.7-8.5%) | 3.2% (0.1-6.3%) | 0%                | 10.5% (0.6-20.4%) | 0%      | <b>5.8% (3.9-7.7%)</b> |
| <b>Pharmacist Prescriber</b>    | Items written/omitted                   | 0                  | 3               | 0               | 0                 | 7                 | 0       | <b>10</b>              |
|                                 | Errors found                            | 0                  | 0               | 0               | 0                 | 0                 | 0       | <b>0</b>               |

1  
2  
3  
4  
5  
6  
7  
8  
9  
10  
11  
12  
13  
14  
15  
16  
17  
18  
19  
20  
21  
22  
23  
24  
25  
26  
27  
28  
29  
30  
31  
32  
33  
34  
35  
36  
37  
38  
39  
40  
41  
42  
43  
44  
45  
46  
47  
48  
49

| PRESCRIBER                | DESCRIPTION                                | PRESCRIBING STAGE   |                     |                    |                      |                      |           | TOTAL                       |
|---------------------------|--------------------------------------------|---------------------|---------------------|--------------------|----------------------|----------------------|-----------|-----------------------------|
|                           |                                            | On admission        | During stay         | Rewritten          | Leave                | Discharge            | Unknown   |                             |
|                           | % error rate<br>(95% confidence intervals) | -                   | 0%                  | -                  | -                    | 0%                   | -         | <b>0%</b>                   |
| <b>Nurse Prescriber</b>   | Items written/omitted                      | 0                   | 12                  | 0                  | 0                    | 0                    | 0         | <b>12</b>                   |
|                           | Errors found                               | 0                   | 0                   | 0                  | 0                    | 0                    | 0         | <b>0</b>                    |
|                           | % error rate<br>(95% confidence intervals) | -                   | 0%                  | -                  | -                    | -                    | -         | <b>0%</b>                   |
| <b>Unknown Prescriber</b> | Items written/omitted                      | 86                  | 63                  | 85                 | 6                    | 26                   | 0         | <b>266</b>                  |
|                           | Errors found                               | 6                   | 6                   | 4                  | 1                    | 4                    | 0         | <b>21</b>                   |
|                           | % error rate<br>(95% confidence intervals) | 7.0%<br>(1.6-12.4%) | 9.5%<br>(2.2-16.8%) | 4.7%<br>(0.2-9.2%) | 16.7%<br>(0.0-49.3%) | 15.4%<br>(1.2-29.5%) | -         | <b>7.9%<br/>(4.6-11.1%)</b> |
| <b>TOTAL</b>              | Items written/omitted                      | <b>863</b>          | <b>1530</b>         | <b>1273</b>        | <b>247</b>           | <b>495</b>           | <b>19</b> | <b>4427</b>                 |
|                           | Errors found                               | <b>92</b>           | <b>100</b>          | <b>46</b>          | <b>11</b>            | <b>32</b>            | <b>0</b>  | <b>281</b>                  |

1  
2  
3  
4  
5  
6  
7  
8  
9  
10  
11  
12  
13  
14  
15  
16  
17  
18  
19  
20  
21  
22  
23  
24  
25  
26  
27  
28  
29  
30  
31  
32  
33  
34  
35  
36  
37  
38  
39  
40  
41  
42  
43  
44  
45  
46  
47  
48  
49

| PRESCRIBER | DESCRIPTION                                | PRESCRIBING STAGE                  |                                  |                                  |                                  |                                  |           | TOTAL                            |
|------------|--------------------------------------------|------------------------------------|----------------------------------|----------------------------------|----------------------------------|----------------------------------|-----------|----------------------------------|
|            |                                            | On admission                       | During stay                      | Rewritten                        | Leave                            | Discharge                        | Unknown   |                                  |
|            | % error rate<br>(95% confidence intervals) | <b>10.7%</b><br><b>(8.6-12.7%)</b> | <b>6.5%</b><br><b>(5.3-7.8%)</b> | <b>3.6%</b><br><b>(2.6-4.6%)</b> | <b>4.5%</b><br><b>(1.9-7.0%)</b> | <b>6.5%</b><br><b>(4.3-8.6%)</b> | <b>0%</b> | <b>6.3%</b><br><b>(5.6-7.1%)</b> |

\* The Foundation Year (FY) programme corresponds to the first two years of medical training for junior doctors after completion of their undergraduate degree, and is similar to internships or residencies in other countries.

\*\* Speciality trainees include General Practitioner trainee (GPST1-3) and psychiatry trainee (CT1-2 and ST4-6) medical grades; FY = Foundation Year

Peer review only

### Nature of PEs identified

The vast majority of identified PEs were associated with the oral route of administration (n=216, 75%) and medicines belonging to the central nervous system class (n=165, 57.3%).

The most common types of PEs were medicines omitted on admission to hospital (n=36, 12.5%), followed by administration times/frequencies that were incorrect or missing (n=33, 11.5%), missing strengths or doses (n=30, 10.4%) and prescribing incorrect drug formulations (n=26, 9.0%). Other common PE subtypes included failing to sign a prescription (n=24), incorrect or missing start dates for prescriptions (n=21) and under-dosing (n=20).

Table 2 shows the frequency of all PE subtypes. After review by the multidisciplinary panel, 162 (56.3%) PEs were considered clinically relevant for patients. No PEs were reported by pharmacists to cause actual patient harm. These findings are summarised in Table 3 and a summary of all potentially serious and life-threatening errors is provided in Table 4.

Half of the 20 potentially serious or life threatening PEs involved central nervous system medicines, with the remaining 10 including cardiovascular system (n=5), endocrine system (n=4, all insulin) and anti-infective therapies (n=1). These error types occurred more commonly in female patients (n=14) and most frequently involved clinical contraindications (n=6), omission on admission (n=5) and missing strengths or doses (n=4); 3 female patients accumulated 11 of these errors, with one affected by 4 clinical contraindications, another with 4 with missing strengths/doses and the final patient with 3 drugs omitted on admission. In contrast, 25% of all potentially serious or life-threatening PEs involved injectable administration routes (subcutaneous route (n=4) or intramuscular (n=1) compared with total of 20/288 (6.9%) overall).



**Table 2: Types of prescribing errors**

| Type of prescribing error         | Subtypes                                           | Frequency (%) |
|-----------------------------------|----------------------------------------------------|---------------|
| <b>Need for drug</b>              | Omission on admission                              | 36 (12.5)     |
|                                   | Omission of discharge/leave prescription           | 14 (4.9)      |
|                                   | Duplication                                        | 13 (4.5)      |
|                                   | Continuation for longer than needed                | 10 (3.5)      |
|                                   | Omission on rewritten prescription                 | 3 (1.0)       |
|                                   | Drug not prescribed but indicated                  | 1 (0.3)       |
|                                   | No indication                                      | 1 (0.3)       |
|                                   | Premature discontinuation                          | 0             |
| <b>Selection of specific drug</b> | Clinical contra-indication                         | 9 (3.1)       |
|                                   | Unintentional prescription of drug                 | 2 (0.7)       |
|                                   | Continuation after adverse drug reaction           | 0             |
|                                   | Drug interaction                                   | 0             |
|                                   | Significant allergy                                | 0             |
| <b>Select dosage regimen</b>      | Underdose                                          | 20 (6.9)      |
|                                   | Overdose                                           | 12 (4.2)      |
|                                   | No maximum dose                                    | 5 (1.7)       |
|                                   | Drug interaction not taken into account            | 1 (0.3)       |
|                                   | Dose / rate mismatch                               | 0             |
|                                   | No dosage alteration after levels out of range     | 0             |
|                                   | Daily dose divided incorrectly                     | 0             |
| <b>Administration of drug</b>     | Administration times/frequencies incorrect/missing | 34 (11.8)     |
|                                   | Incorrect formulation                              | 26 (9.0)      |
|                                   | Start date incorrect/missing                       | 21 (7.3)      |
|                                   | Intramuscular instructions incorrect/missing       | 0             |
|                                   | Incorrect route                                    | 0             |
| <b>Provide drug product</b>       | Strength/dose missing                              | 30 (10.4)     |
|                                   | No signature                                       | 24 (8.3)      |
|                                   | Product/formulation not specified                  | 17 (5.9)      |

1  
2  
3  
4  
5  
6  
7  
8  
9  
10  
11  
12  
13  
14  
15  
16  
17  
18  
19  
20  
21  
22  
23  
24  
25  
26  
27  
28  
29  
30  
31  
32  
33  
34  
35  
36  
37  
38  
39  
40  
41  
42  
43  
44  
45  
46  
47  
48  
49  
50  
51  
52  
53  
54  
55  
56  
57  
58  
59  
60

| Type of prescribing error | Subtypes                                                                     | Frequency (%) |
|---------------------------|------------------------------------------------------------------------------|---------------|
|                           | Prescribed medication not in accordance with Mental Health Act documentation | 4 (1.4)       |
|                           | Route missing                                                                | 3 (1.0)       |
|                           | Controlled drug requirements incorrect/missing                               | 1 (0.3)       |
|                           | Prescription initiated before registration with monitoring service           | 1 (0.3)       |

---

For peer review only

**Table 3: Severity ratings for identified PEs following multidisciplinary review**

| Potential severity criteria            |                  | Examples                                                                                                                                               | Frequency (%) |
|----------------------------------------|------------------|--------------------------------------------------------------------------------------------------------------------------------------------------------|---------------|
| Not clinically relevant                | Minor            | Prescription not signed.                                                                                                                               | 126 (43.8)    |
|                                        |                  | No start date on prescription.                                                                                                                         |               |
| Clinically relevant prescribing errors | Significant      | The dose of the drug is too low for a patient with the condition being treated.                                                                        | 142 (49.3)    |
|                                        |                  | The wrong route of administration for the condition being treated is ordered e.g. intramuscular depot is prescribed for subcutaneous administration.   |               |
|                                        | Serious          | The dose of the drug would result in serum drug levels in the toxic range, e.g. lithium levels 1-2 mmol/L.                                             |               |
|                                        |                  | The drug orders could exacerbate the patient's condition, e.g. drug-drug interaction or drug-disease interaction.                                      | 19 (6.6)      |
|                                        | Life-threatening | The drug prescribed has a high potential to cause a life threatening adverse reaction, such as anaphylaxis, in light of the patient's medical history. | 1 (0.3)       |
|                                        |                  | The dose of a potentially life-saving drug is too low for a patient having the disease being treated.                                                  |               |

**Table 4: Descriptions of potentially **serious** and life-threatening prescribing errors**

| Severity                     | Patient age | Patient sex | Medication               | Daily dose (intended) | Indication           | Route of administration | Error description                                                                                                                                                                                                                                                                                    |
|------------------------------|-------------|-------------|--------------------------|-----------------------|----------------------|-------------------------|------------------------------------------------------------------------------------------------------------------------------------------------------------------------------------------------------------------------------------------------------------------------------------------------------|
| Potentially life threatening | 46          | Male        | Zuclopenthixol Decanoate | 300mg weekly          | Schizophrenia        | Intramuscular           | Clinical Contraindication:<br>Patient prescribed this medication after previous prolonged QTc whilst taking olanzapine (no QTc values provided). After olanzapine stopped and zuclopenthixol started, no further ECG taken despite receiving two doses of depot (one of which was an increased dose) |
| Potentially <b>serious</b>   | 76          | Female      | Moxonidine               | 400 micrograms        | Hypertension         | Oral                    | Clinical contraindication:<br>Medication continued on rewritten prescription despite very low blood pressure recorded.                                                                                                                                                                               |
|                              |             |             | Bisoprolol               | 5mg                   | Hypertension         | Oral                    | As above – same patient                                                                                                                                                                                                                                                                              |
|                              |             |             | Lisinopril               | 10mg                  | Hypertension         | Oral                    | As above – same patient                                                                                                                                                                                                                                                                              |
|                              |             |             | Doxazosin                | 16mg                  | Hypertension         | Oral                    | As above – same patient                                                                                                                                                                                                                                                                              |
| Potentially <b>serious</b>   | 26          | Female      | Quetiapine               | 450mg                 | Personality disorder | Oral                    | Omission on admission:<br>Medicine not prescribed upon inpatient admission                                                                                                                                                                                                                           |
|                              |             |             | Diazepam                 | 15mg                  | Personality disorder | Oral                    | As above – same patient – doses missed                                                                                                                                                                                                                                                               |
|                              |             |             | Mirtazapine              | 45mg                  | Personality disorder | Oral                    | As above – same patient – doses missed                                                                                                                                                                                                                                                               |
| Potentially <b>serious</b>   | 48          | Female      | Novorapid insulin        | 6 units AM            | Diabetes             | Subcutaneous            | Dose/strength missing:<br>Insulin dose prescribed as ‘U’ instead of ‘Units’ which could have been mistaken for 0 i.e. 10 fold error                                                                                                                                                                  |

1  
2  
3  
4  
5  
6  
7  
8  
9  
10  
11  
12  
13  
14  
15  
16  
17  
18  
19  
20  
21  
22  
23  
24  
25  
26  
27  
28  
29  
30  
31  
32  
33  
34  
35  
36  
37  
38  
39  
40  
41  
42  
43  
44  
45  
46  
47  
48  
49

| Severity                   | Patient age | Patient sex | Medication        | Daily dose (intended) | Indication                         | Route of administration | Error description                                                                                   |
|----------------------------|-------------|-------------|-------------------|-----------------------|------------------------------------|-------------------------|-----------------------------------------------------------------------------------------------------|
|                            |             |             | Novorapid insulin | 4 units PM            | Diabetes                           | Subcutaneous            | As above – same patient                                                                             |
|                            |             |             | Novorapid insulin | 6 units PM            | Diabetes                           | Subcutaneous            | As above – same patient                                                                             |
|                            |             |             | Novorapid insulin | 4 units PRN           | Diabetes                           | Subcutaneous            | As above – same patient                                                                             |
| Potentially <u>serious</u> | 78          | Female      | Haloperidol       | 4mg                   | Psychotic depression               | Oral                    | Under-dose:<br>Dose prescribed on admission as 500 micrograms twice daily – only 25% of normal dose |
| Potentially <u>serious</u> | 32          | Female      | Sodium valproate  | 500mg                 | Epilepsy                           | Oral                    | Omission on admission:<br>Medication not prescribed on admission – dose missed                      |
| Potentially <u>serious</u> | 32          | Male        | Enalapril         | 20mg                  | Hypertension                       | Oral                    | Overdose:<br>Prescribed as 200mg daily on admission – 10 times overdose                             |
| Potentially <u>serious</u> | Unknown     | Male        | Co-trimoxazole    | 960mg                 | Pneumocystis pneumonia prophylaxis | Oral                    | Omission on admission:<br>Failure to prescribe on admission to hospital                             |
| Potentially <u>serious</u> | 79          | Male        | Risperidone       | 3mg                   | Psychosis                          | Oral                    | Duplication:<br>Dose increased from 1mg twice daily to 1.5mg twice                                  |

1  
2  
3  
4  
5  
6  
7  
8  
9  
10  
11  
12  
13  
14  
15  
16  
17  
18  
19  
20  
21  
22  
23  
24  
25  
26  
27  
28  
29  
30  
31  
32  
33  
34  
35  
36  
37  
38  
39  
40  
41  
42  
43  
44  
45  
46  
47  
48  
49

| Severity                   | Patient age | Patient sex | Medication          | Daily dose (intended) | Indication | Route of administration | Error description                                                                                                                        |
|----------------------------|-------------|-------------|---------------------|-----------------------|------------|-------------------------|------------------------------------------------------------------------------------------------------------------------------------------|
|                            |             |             |                     |                       |            |                         | daily, but old entry not cancelled.                                                                                                      |
| Potentially <u>serious</u> | 44          | Male        | Citalopram          | 30mg                  | Depression | Oral                    | Omission on discharge/leave prescription:<br>Omitted from discharge prescription                                                         |
| Potentially <u>serious</u> | Unknown     | Female      | Clozapine           | Titration             | Psychosis  | Oral                    | Clinical contra-indication: despite efforts to slow pace of clozapine dose escalation (due to tachycardia), dose increased by 50mg daily |
| Potentially <u>serious</u> | 34          | Male        | Sodium valproate MR | 1700mg                | Siezuers   | Oral                    | Under dose:<br>On admission, missed off 700mg morning dose                                                                               |

review only

### Predictors of PEs

Multivariate logistic regression analysis found that specialist trainee registrars (OR 1.23, 95% CI 1.01-1.51) and staff grade psychiatrists (OR 1.50 (1.05-2.13)) were more likely to make PEs than more junior foundation year 1 doctors (FY1) when controlling for prescribing stage, electronic discharge prescriptions and when clustered for study site (as shown in Table 5).

When compared to items written or omitted during the patients stay, prescribers were less likely to make PEs when medication charts were rewritten or when patients were discharged home (OR 0.52 (0.33-0.82) and 0.87 (0.79-0.97) respectively). Newly written or omitted items on admission showed no differences in risk of PEs (OR 1.81 (0.51-6.37)) nor did items written or omitted for patient leave (OR 0.66 (0.39-1.11)) when compared to those screened during patient stay. No difference in risk of PE was observed when discharge prescriptions written on a standard electronic pro-forma were compared to handwritten counterparts (OR 1.30 (0.72-2.35)).

### Predictors of clinically relevant PEs

As shown in Table 5, multivariate logistic regression analysis revealed that more experienced medical staff were more likely to make a clinically relevant PE than their junior counterparts (FY1), with speciality trainee registrars (General Practitioner or psychiatry) and consultant psychiatrists being twice as likely to do so (OR 2.61 (2.11-3.22) and 2.03 (1.66-2.50) respectively).

Patient admission and discharge were associated with a significantly increased risk of making a potentially clinically relevant PE when compared with during stay (OR 5.39 (2.72-10.69) and 4.23 (3.68-4.87) respectively), with the process of rewriting prescriptions also at

1  
2  
3 significantly higher risk (OR 2.27 (1.72-2.99)). No difference in risk was observed when  
4  
5 leave prescriptions were compared to those written during patient stay.  
6  
7

8 When compared against those errors associated with the 'need for drug' PE subcategory, the  
9  
10 groups 'select dosage regimen', 'administration of drug' and 'provide drug product' were  
11  
12 associated with a lower risk of potentially clinically relevant PEs (OR 0.44 (0.20-0.97), 0.17  
13  
14 (0.09-0.32), 0.04 (0.02-0.12) respectively). The latter two groups in particular were  
15  
16 associated with much lower risks; PE types included in these groups were mostly clerical in  
17  
18 origin (e.g., missing prescriber signature, see Table 2).  
19  
20  
21

22 Neither prescriptions written on a standard electronic pro-forma (OR 0.92 (0.38-2.22)) nor  
23  
24 the central nervous system medication class (OR 0.71 (0.34-1.49)) were associated with an  
25  
26 increased likelihood of clinically relevant PEs when compared to minor errors.  
27  
28  
29  
30  
31  
32  
33  
34  
35  
36  
37  
38  
39  
40  
41  
42  
43  
44  
45  
46  
47  
48  
49  
50  
51  
52  
53  
54  
55  
56  
57  
58  
59  
60



**Table 5: Predictors of (a) error likelihood and (b) potential error severity: multivariate logistic models**

| FACTOR                                     |                            | ODDS OF PRESCRIBING ERROR COMPARED TO NO ERROR |                    | ODDS OF CLINICALLY RELEVANT PRESCRIBING ERROR RATHER THAN A MINOR ERROR* |                     |
|--------------------------------------------|----------------------------|------------------------------------------------|--------------------|--------------------------------------------------------------------------|---------------------|
|                                            |                            | Odds ratio (OR)                                | 95% CI             | Odds ratio (OR)                                                          | 95% CI              |
| Prescriber                                 | FY1                        | Reference                                      |                    | Reference                                                                |                     |
|                                            | FY2                        | 0.96                                           | 0.84 – 1.11        | 1.83                                                                     | 0.77 – 4.38         |
|                                            | Speciality Trainee **      | <b>1.23</b>                                    | <b>1.01 – 1.51</b> | <b>2.61</b>                                                              | <b>2.11 – 3.22</b>  |
|                                            | Staff Grade Psychiatrist   | <b>1.50</b>                                    | <b>1.05 – 2.13</b> | 2.88                                                                     | 0.70 – 11.83        |
|                                            | Consultant Psychiatrist    | 1.18                                           | 0.71 – 1.95        | <b>2.03</b>                                                              | <b>1.66 – 2.50</b>  |
| Prescribing stage                          | During stay                | Reference                                      |                    | Reference                                                                |                     |
|                                            | Admission                  | 1.81                                           | 0.51 – 6.37        | <b>5.39</b>                                                              | <b>2.72 – 10.69</b> |
|                                            | Re-written item            | <b>0.52</b>                                    | <b>0.33 – 0.82</b> | <b>2.27</b>                                                              | <b>1.72 – 2.99</b>  |
|                                            | Leave                      | 0.66                                           | 0.39 – 1.11        | 2.57                                                                     | 0.74 – 8.95         |
|                                            | Discharge                  | <b>0.87</b>                                    | <b>0.79 – 0.97</b> | <b>4.23</b>                                                              | <b>3.68 – 4.87</b>  |
| Electronic <u>discharge pro-forma</u> item | No                         | Reference                                      |                    | Reference                                                                |                     |
|                                            | Yes                        | 1.30                                           | 0.72 – 2.35        | 0.92                                                                     | 0.38 – 2.22         |
| Medication class †                         | All others                 | -                                              | -                  | Reference                                                                |                     |
|                                            | Central Nervous System     | -                                              | -                  | 0.71                                                                     | 0.34 – 1.49         |
| Prescribing error subcategories ***        | Need for drug              | -                                              | -                  | Reference                                                                |                     |
|                                            | Selection of specific drug | -                                              | -                  | 2.36                                                                     | 0.23 – 24.48        |
|                                            | Select dosage regimen      | -                                              | -                  | <b>0.44</b>                                                              | <b>0.20 – 0.97</b>  |
|                                            | Administration of drug     | -                                              | -                  | <b>0.17</b>                                                              | <b>0.09 – 0.32</b>  |
|                                            | Provide drug product       | -                                              | -                  | <b>0.04</b>                                                              | <b>0.02 – 0.12</b>  |
| Pseudo R squared values                    |                            | <b>0.02</b>                                    |                    | <b>0.28</b>                                                              |                     |

| FACTOR | ODDS OF PRESCRIBING ERROR COMPARED TO NO ERROR |        | ODDS OF CLINICALLY RELEVANT PRESCRIBING ERROR RATHER THAN A MINOR ERROR* |        |
|--------|------------------------------------------------|--------|--------------------------------------------------------------------------|--------|
|        | Odds ratio (OR)                                | 95% CI | Odds ratio (OR)                                                          | 95% CI |

FY = Foundation Year; \* Potentially clinically relevant PEs (either significant, serious or life-threatening) vs. minor errors; \*\* Speciality trainees include GPST1-3, CT1-2 and ST4-6 medical grades; \*\*\* see table 2 for a list of PE subcategories; † = no odds ratio for risk of at least one PE as no denominator data collected for medication classes

For peer review only

## DISCUSSION

### Main findings

This is the first study to prospectively identify the prevalence, nature and predictors of inpatient prescribing errors in mental health hospitals for only newly written or omitted prescription items, finding an overall rate of 6.3% (95% CI 5.6-7.1%). Most of the PEs identified related to omissions of drugs on admission to or discharge from hospital as well as missing or incorrect prescription requirements (e.g. dose, frequency, signatures, formulations). Over half (56%) of all 288 errors identified were considered to be clinically relevant with the potential to cause patient harm, with 20 (6.9%) being graded as potentially serious or life-threatening. Speciality trainees and staff grade psychiatrists were more likely to make a PE, with speciality trainees and consultants more likely to make a potentially clinically relevant PE. Rewritten and discharge prescription items were significantly less likely to contain a PE than those written during patient stay, but were found to be at higher risk of potentially clinically relevant errors (especially on admission and discharge, where the risk was 5 and 4 times that of during stay, respectively). PE subtypes including prescription writing errors were associated with significantly lower risks of potentially clinically relevant PEs when compared to groups which included omitted and duplicated drugs. Electronic prescribing at discharge using a template and the 'central nervous system' drug class (which contains all psychotropic medicines) were found not to be associated with an increased risk of clinically relevant PEs.

### Implications of findings

Our overall PE rate of 6.3% is higher than the 2.2%<sup>[18]</sup> and 2.4%<sup>[22]</sup> previously reported in UK psychiatric hospitals using prospective medication chart review, and similar to a median

1  
2  
3 rate of 7 per 100 medication orders reported in general hospitals worldwide.<sup>[2]</sup> However,  
4  
5 differences in the type of prescription items that were assessed (i.e. we included only newly  
6  
7 omitted and written items), the data collection periods (4 days<sup>[18]</sup> or 5 days<sup>[22]</sup> versus 10 in  
8  
9 this study), severity assessments, study settings and year of publication preclude more direct  
10  
11 comparisons.<sup>[2,34]</sup> Recent UK based general hospital PE investigations using similar  
12  
13 methodology as this study reported higher PE rates,<sup>[7,8]</sup> which may reflect different patient  
14  
15 complexities, the working environment, the medicines used (e.g. intravenous medicines are  
16  
17 rarely used in psychiatry) and the predominant focus on mental health rather than physical  
18  
19 health in psychiatry settings. In contrast, retrospective reviews of case notes / medication  
20  
21 charts to identify PEs in psychiatry<sup>[25]</sup> yields higher error rates of 15% of error opportunities  
22  
23 although the denominator and setting of this study was different to ours.  
24  
25  
26  
27

28 The finding that a sizeable proportion of PEs concerned dosing errors or incomplete  
29  
30 prescription items has been noted in other studies of PEs in psychiatry,<sup>[18,20,22]</sup> and in general  
31  
32 hospitals.<sup>[2,7-9]</sup> However, whilst studies in general hospitals also found that the omission of  
33  
34 drugs on admission/discharge/rewritten prescriptions were a leading PE subtype,<sup>[2,7-9]</sup>  
35  
36 previous studies in psychiatry did not<sup>[18,20,22]</sup> ~~which could relate to~~ Omission of drugs on  
37  
38 patient transfer may arise due to inadequate communication of drug information<sup>[8,35]</sup> an issue  
39  
40 which may affect mental health settings more acutely given the increasing number of  
41  
42 community services creating more care transfer interfaces.<sup>[13,36,37]</sup> One UK study found that  
43  
44 69% and 43% of hospital admission and post-discharge medicines were affected by a  
45  
46 medication discrepancy, respectively<sup>[17]</sup> and more recently studies found 56.2% of hospital  
47  
48 admissions (UK based)<sup>[38]</sup> and 23.3% of discharges (USA based)<sup>[39]</sup> were affected, with the  
49  
50 most common types being drug omissions. These studies highlight the importance of  
51  
52  
53  
54  
55  
56  
57  
58  
59  
60

1  
2  
3 medicines reconciliation, a practice which is established in UK mental health hospitals<sup>[40]</sup> and  
4  
5 which has shown value across hospital settings.<sup>[38,40-42]</sup>  
6  
7

8  
9 Despite the prevalence of drug omission errors during care transfer the patient admission  
10 stage was not associated with significantly higher PE rates than during patient stay in this  
11 study, with the re-write and discharge stages associated with a significantly lower risks of  
12 PEs. However, errors occurring on admission, re-write and discharge were more likely to  
13 harm patients (considered as clinically significant errors – potential to cause significant,  
14 serious or life-threatening harm), which could reflect the fact that errors could cause  
15 immediate deterioration in a patients clinical condition and/or go unnoticed for long periods  
16 of time. The clear dangers posed by patient transfer in psychiatry have been recognised  
17 nationally in the UK,<sup>[37,43]</sup> though overall this challenge has received less attention than in  
18 general hospitals.<sup>[13,15,36]</sup> Future research should seek to clarify the frequency, nature and  
19 severity of PEs across and between care interfaces in the mental health setting, as well as  
20 investigating further the impact of medicines reconciliation.  
21  
22  
23  
24  
25  
26  
27  
28  
29  
30  
31  
32  
33  
34

35  
36 This study has indicated that more senior speciality trainees and staff grade psychiatrists are  
37 at a significantly increased risk of making a PE when compared to their FY one colleagues.  
38 This is in contrast to the EQUIP study, which found that junior doctors were more likely to  
39 make PEs.<sup>[7]</sup> The regression analysis also revealed that consultants were at a higher risk of  
40 making potentially clinically relevant PEs, along with speciality trainees when compared to  
41 FY one doctors. Whilst senior doctor prescribing has not been formerly evaluated in  
42 psychiatry in relation to PEs, the bulk of prescribing on admission and discharge (where more  
43 clinically significant errors occurred) was carried out by speciality trainees, which may  
44 explain why this association was found. Consultant prescribing may be more complex and  
45 risky than junior doctor prescribing, with negative perceptions towards prescription re-writes  
46  
47  
48  
49  
50  
51  
52  
53  
54  
55  
56  
57  
58  
59  
60

1  
2  
3 from medical staff noted in research from general hospitals also potentially contributing.<sup>[11]</sup>

4  
5 Future research should investigate in detail the prescribing of more senior clinicians in mental  
6  
7 health, as previous studies making similar comparisons did not do so in the context of total  
8  
9 prescribing burdens using multivariate regression analysis.<sup>[18,22]</sup>

10  
11  
12 This study has emphasised the importance of pharmacy teams in the detection and prevention  
13  
14 of PEs and associated patient harms in mental health hospitals, as seen elsewhere.<sup>[9,18,20,22,25,38]</sup>

15  
16  
17 ~~Despite their important contribution to medicines safety and governance there has been less~~  
18  
19 ~~investment in pharmacy services in UK mental health when compared to acute hospitals.~~<sup>[43,44]</sup>

20  
21 Given the important contribution of medicines to avoidable harm in hospitals, the input of  
22  
23 pharmacy teams in keeping patients safe should not be underestimated.<sup>[43,44]</sup>

24  
25  
26 Our analysis did not reveal any difference in the risk of a PE between electronic and hand  
27  
28 written prescriptions, though this should be viewed with caution as the number of  
29  
30 electronically prescribed items in our analysis was low and the nature of this type of  
31  
32 prescribing was limited to discharge prescription templates at one study site (i.e. no  
33  
34 commercially available e-prescribing software was used). Although the benefits of electronic  
35  
36 prescribing software should not be overlooked<sup>[15]</sup> further investigation may be required as  
37  
38 despite important reductions in some errors the wider effects of electronic prescribing  
39  
40 systems on MEs and ADEs is not clear, and in some cases novel PE opportunities may be  
41  
42 created.<sup>[44]</sup>

43  
44  
45 To our knowledge, there have been no published attempts to determine the causes of PEs in  
46  
47 inpatient mental health settings despite growing understanding in general hospitals that these  
48  
49 errors involve multiple, interacting antecedents.<sup>[7,8,10-12]</sup> Although a number of different  
50  
51 interventions designed to reduce PEs have been suggested,<sup>[45]</sup> future research should focus on  
52  
53 determining the causes of PEs in psychiatry using theoretical frameworks such as Reason's  
54  
55  
56  
57  
58  
59  
60

Model of Accident Causation<sup>[46]</sup> as recommended previously.<sup>[13,15,47]</sup> Reason's model has been used frequently in general hospitals for this purpose,<sup>[7,10-12]</sup> and such investigations would facilitate measurement of the value of remedial interventions in the psychiatry setting. As a large proportion of care for mental health patients takes place in the community, future studies of PEs could also be carried out in this setting.<sup>[13,36]</sup>

### **Strengths and limitations**

Key strengths of this study are that it ~~was larger<sup>[18,20]</sup> and lasted for a longer duration<sup>[18,22]</sup> than previous work~~, used standardised training of data collectors, sought to compare risk of PEs and clinically relevant errors between prescribers and prescribing stages, and collected data on only newly written or omitted items over a range of data collection days so that items were counted only once and the risk of including previously corrected items was minimised.

Although this study was conducted across three sites over a large geographical area, generalizability may be limited when compared to earlier work.<sup>[22]</sup> Combined medication chart and case note review may identify a greater number of PEs,<sup>[30]</sup> so our PE rate maybe an underestimate of the true burden of these errors in mental health hospitals. Whilst data collectors were trained using standardised materials it is impossible to exclude variation in error detection due to differing workloads,<sup>[48]</sup> vigilance and/or individual clinical experience of collectors.<sup>[9,22]</sup> The rate of false positives was minimised by using a multidisciplinary PE review panel, one senior member of which (SDW) had previously evaluated prescribing errors in a much larger study.<sup>[7]</sup> We did not record separate PE rate data for core medical versus general practitioner speciality trainees or psychotropic versus non-psychotropic medicines, which means that we were unable to compare these different groups.

1  
2  
3 The fact that unknown prescribers were associated with the highest PE rate (7.9% (4.7–  
4 11.1%)) highlights the need to ascertain the identity of prescribers as well as when and where  
5 prescribing took place in order to facilitate optimal patient care and rectify mistakes promptly.  
6  
7 Prescriber identification becomes an even more critical issue given the more recent emphasis  
8  
9 on the importance of feedback to improve prescribing practice and minimise PEs.<sup>[7,8,45,49]</sup>  
10  
11  
12  
13  
14  
15  
16  
17  
18  
19  
20  
21  
22  
23  
24  
25  
26  
27  
28  
29  
30  
31  
32  
33  
34  
35  
36  
37  
38  
39  
40  
41  
42  
43  
44  
45  
46  
47  
48  
49  
50  
51  
52  
53  
54  
55  
56  
57  
58  
59  
60

For peer review only



## CONCLUSION

Prescribing errors may be more common in mental health hospitals than previously reported, and continue to pose a significant challenge to healthcare providers as the majority have the potential to cause patient harm. This study has identified more senior prescribers and care transfer interfaces as potential targets to investigate the burden of these errors in more detail with the aim of formulating remedial approaches. Future work should focus on using theoretical frameworks such as those of human error to investigate the causes of PEs in order to inform the design of interventions aimed at reducing their burden in the psychiatric inpatient setting.

## Acknowledgements

We would like to thank all the pharmacy teams involved in data collection as well as Yin Kwok, Mayamiko Kaoma and Janette Chu for their assistance with data entry.

## Competing interests

All the authors have no competing interests to declare. This work has not been posted or published elsewhere in its entirety. An abstract summarising the study will soon be published after oral presentation at the Prescribing and Research in Medicines Management (PRIMM) Annual Scientific Meeting 2014 (2<sup>nd</sup> May, London, UK).

## Funding

This research received no specific grant from any funding agency in the public, commercial or not-for-profit sectors. This study was funded by the University of Manchester and participating mental health NHS Trusts. The sponsors had no role in study design, in the collection, analysis and interpretation of data, or in the writing of the report and in the decision to submit the report for publication.

## Contributor statement

Design of study: all authors. Review of study data (expert panel): RNK, JJV, SDW. Analysis of data: RNK, DMA. Preparation of manuscript: RNK. Critical review of manuscript: all authors. Approval of submitted manuscript (current version): all authors.

**REFERENCES**

1. de Vries EN, Ramrattan MA, Smorenburg SM, et al. The incidence and nature of in-hospital adverse events: a systematic review. *Qual Saf Health Care* 2008;17(3):216-223.
2. Lewis PJ, Dornan T, Taylor D, et al. Prevalence, incidence and nature of prescribing errors in hospital inpatients: a systematic review. *Drug Saf* 2009;32(5):379-389.
3. Keers RN, Williams SD, Cooke J, et al. Prevalence and nature of medication administration errors in health care settings: A Systematic Review of Direct Observational Evidence. *Ann Pharmacother* 2013;47(2):237-256.
4. Kopp BJ, Erstad BL, Allen ME, et al. Medication errors and adverse drug events in an intensive care unit: direct observation approach for detection. *Crit Care Med* 2006;34(2):415-425.
5. Buckley MS, Erstad BL, Kopp BJ, et al. Direct observation approach for detecting medication errors and adverse drug events in a pediatric intensive care unit. *Pediatr Crit Care Med* 2007;8(2):145-152.
6. Carayon P, Wetterneck TB, Cartmill R, et al. Characterising the complexity of medication safety using a human factors approach: an observational study in two intensive care units. *BMJ Qual Saf* 2014;23(1):56-65.
7. Dornan T, Ashcroft D, Heathfield H, et al. An in depth investigation into causes of prescribing errors by foundation trainees in relation to their medical education. EQUIP study. 2009. Accessed at: [http://www.gmc-uk.org/FINAL\\_Report\\_prevalence\\_and\\_causes\\_of\\_prescribing\\_errors.pdf\\_28935150.pdf](http://www.gmc-uk.org/FINAL_Report_prevalence_and_causes_of_prescribing_errors.pdf_28935150.pdf) (accessed 10/03/2014).
8. Franklin BD, Reynolds M, Shebl NA, et al. Prescribing errors in hospital inpatients: a three-centre study of their prevalence, types and causes. *Postgrad Med J* 2011;87(1033):739-745.
9. Seden K, Kirkham JJ, Kennedy T, et al. Cross-sectional study of prescribing errors in patients admitted to nine hospitals across North West England. *BMJ Open* 2013;3(1):pii: e002036. doi: 10.1136/bmjopen-2012-002036.
10. Tully MP, Ashcroft DM, Dornan T, et al. The causes of and factors associated with prescribing errors in hospital inpatients: a systematic review. *Drug Saf* 2009;32(10):819-836.
11. Ross S, Ryan C, Duncan EM, et al. Perceived causes of prescribing errors by junior doctors in hospital inpatients: a study from the PROTECT programme. *BMJ Qual Saf* 2013;22(2):97-102.
12. Lewis PJ, Ashcroft DM, Dornan T, et al. Exploring the causes of junior doctors' prescribing mistakes: a qualitative study. *Br J Clin Pharmacol* 2014;[78\(2\):310-319](#).

- 1  
2  
3 13. Maidment ID, Lelliott P, Paton C. Medication errors in mental healthcare: a systematic  
4 review. *Qual Saf Health Care* 2006;15(6):409-413.
- 5  
6  
7 14. Mann K, Rothschild JM, Keohane CA, et al. Adverse drug events and medication errors  
8 in psychiatry: methodological issues regarding identification and classification. *World J Biol*  
9 *Psychiatry* 2008;9(1):24-33.
- 10  
11  
12 15. Procyshyn RM, Barr AM, Brickell T, et al. Medication errors in psychiatry: a  
13 comprehensive review. *CNS Drugs* 2010;24(7):595-609.
- 14  
15  
16 16. Nirodi P, Mitchell AJ. The quality of psychotropic drug prescribing in patients in  
17 psychiatric units for the elderly. *Aging Ment Health* 2002;6(2):191-196.
- 18  
19  
20 17. Morcos S, Francis S-A, Duggan C. Where are the weakest links?: A descriptive study of  
21 discrepancies in prescribing between primary and secondary sectors of mental health service  
22 provision. *Psychiatric Bull* 2002;26:371-374.
- 23  
24  
25 18. Haw C, Stubbs J. Prescribing errors detected by pharmacists at a psychiatric hospital.  
26 *Pharmacy In Practice* 2003;10:64-66.
- 27  
28  
29 19. Paton C, Gill-Banham S. Prescribing errors in psychiatry. *Psychiatric Bull* 2003;27:208-  
30 210.
- 31  
32  
33 20. Stubbs J, Haw C, Cahill C. Auditing prescribing errors in a psychiatric hospital. Are  
34 pharmacists' interventions effective? *Hosp Pharm* 2004;11:203-206.
- 35  
36  
37 21. Maidment ID, Thorn A. A medication error reporting scheme: analysis of the first 12  
38 months. *Psychiatric Bull* 2005;29:298-301.
- 39  
40  
41 22. Stubbs J, Haw C, Taylor D. Prescription errors in psychiatry - a multi-centre study. *J*  
42 *Psychopharmacol* 2006;20(4):553-561.
- 43  
44  
45 23. Haw C, Cahill C. A computerized system for reporting medication events in psychiatry:  
46 The first two years of operation. *J Psychiatr Ment Health Nurs* 2011;18(4):308-315.
- 47  
48  
49 24. Grasso BC, Genest R, Yung K, et al. Reducing errors in discharge medication lists by  
50 using personal digital assistants. *Psychiatr Serv* 2002;53(10):1325-1326.
- 51  
52  
53 25. Grasso BC, Genest R, Jordan CW, et al. Use of chart and record reviews to detect  
54 medication errors in a state psychiatric hospital. *Psychiatr Serv* 2003;54(5):677-681.
- 55  
56  
57 26. Rothschild JM, Mann K, Keohane CA, et al. Medication safety in a psychiatric hospital.  
58 *Gen Hosp Psychiatry* 2007;29(2):156-162.
- 59  
60 27. Jayaram G, Doyle D, Steinwachs D, et al. Identifying and reducing medication errors in  
psychiatry: creating a culture of safety through the use of an adverse event reporting  
mechanism. *J Psychiatr Pract* 2011;17(2):81-88.

- 1  
2  
3 28. Soerensen AL, Lisby M, Nielsen LP, et al. The medication process in a psychiatric  
4 hospital: are errors a potential threat to patient safety? *Risk Manag Healthc Policy* 2013;6:23-  
5 31.  
6  
7  
8 29. Maidment ID, Haw C, Stubbs J, et al. Medication errors in older people with mental  
9 health problems: a review. *Int J Geriatr Psychiatry* 2008;23(6):564-573.  
10  
11 30. Franklin BD, Birch S, Savage I, et al. Methodological variability in detecting prescribing  
12 errors and consequences for the evaluation of interventions. *Pharmacoepidemiol Drug Saf*  
13 2009;18(11):992-999.  
14  
15 31. Meyer-Massetti C, Cheng CM, Schwappach DL, et al. Systematic review of medication  
16 safety assessment methods. *Am J Health Syst Pharm* 2011;68(3):227-240.  
17  
18 32. Dean B, Barber N, Schachter M. What is a prescribing error? *Qual Health Care*  
19 2000;9(4):232-237.  
20  
21 33. Joint Formulary Committee. *British National Formulary*. 66<sup>th</sup> ed. London: BMJ Group  
22 and Pharmaceutical Press, 2013.  
23  
24 34. Garfield S, Reynolds M, Dermont L, et al. Measuring the severity of prescribing errors: a  
25 systematic review. *Drug Saf* 2013;36(12):1151-1157.  
26  
27 35. Kripalani S, Jackson AT, Schnipper JL, et al. Promoting effective transitions of care at  
28 hospital discharge: a review of key issues for hospitalists. *J Hosp Med* 2007;2(5):314-323.  
29  
30 36. Maidment ID, Parmentier H. Medication error in mental health: implications for primary  
31 care. *Ment Health Fam Med* 2009;6(4):203-207.  
32  
33 37. National Patient Safety Agency. *Safety in doses: improving the use of medicines in the*  
34 *NHS*. 2009. Available at:  
35 <http://www.nrls.npsa.nhs.uk/EasySiteWeb/getresource.axd?AssetID=61626&type=full&servicetype=...> (accessed 10/03/2014).  
36  
37 38. Brownlie K, Schneider C, Culliford R, et al. Medication reconciliation by a pharmacy  
38 technician in a mental health assessment unit. *Int J Clin Pharm* 2014;[36\(2\):303-309](#).  
39  
40 39. Nelson LA, Graham MR, Schaefer MG. Characterization of medication discrepancies  
41 occurring at the time of hospital discharge from an adult state psychiatric inpatient facility.  
42 *Hosp Pharm* 2011;46(4):254-261.  
43  
44 40. Paton C, McIntyre S, Bhatti SF, et al. Medicines reconciliation on admission to inpatient  
45 psychiatric care: findings from a UK quality improvement programme. *Ther Adv*  
46 *Psychopharmacol* 2011;1(4):101-110.  
47  
48 41. Mueller SK, Sponsler KC, Kripalani S, et al. Hospital-based medication reconciliation  
49 practices: a systematic review. *Arch Intern Med* 2012;172(14):1057-1069.  
50  
51  
52  
53  
54  
55  
56  
57  
58  
59  
60

1  
2  
3 42. Kwan JL, Lo L, Sampson M, et al. Medication reconciliation during transitions of care as  
4 a patient safety strategy: a systematic review. *Ann Intern Med* 2013;158(5 Pt 2):397-403.

5  
6 43. National Mental Health Development Unit. Getting the Medicines Right: medicines  
7 management in adult and older adult acute mental health wards. 2009. Available at:  
8 <http://www.nmhdu.org.uk/silo/files/getting-the-medicines-right--jul-2009.pdf> (accessed  
9 10/03/2014).

11  
12 ~~44. Healthcare Commission. Talking about medicines: the management of medicines in trusts  
13 providing mental health services. London: Commission for Healthcare Audit and Inspection,  
14 2007.~~

15  
16 ~~44. Tully MP. Prescribing errors in hospital practice. *Br J Clin Pharmacol* 2012;74(4):668-  
17 675.~~

18  
19  
20 ~~45. The Health Foundation. Evidence scan: reducing prescribing errors. 2012. Available at:  
21 [http://www.health.org.uk/public/cms/75/76/313/3337/Reducing%20prescribing%20errors%20-](http://www.health.org.uk/public/cms/75/76/313/3337/Reducing%20prescribing%20errors%20-%20evidence%20scan.pdf?realName=3bXWvp.pdf)  
22 [0-%20evidence%20scan.pdf?realName=3bXWvp.pdf](http://www.health.org.uk/public/cms/75/76/313/3337/Reducing%20prescribing%20errors%20-%20evidence%20scan.pdf?realName=3bXWvp.pdf) (accessed 10/03/2014).~~

23  
24  
25 ~~46. Reason J. Human Error. Cambridge: Cambridge University Press, 1990.~~

26  
27 ~~47. Maidment I. Medication-related adverse events in older people with dementia; causes and  
28 possible solutions. PhD Thesis: Aston University, 2013.~~

29  
30 ~~48. Tully MP, Buchan IE. Prescribing errors during hospital inpatient care: factors  
31 influencing identification by pharmacists. *Pharm World Sci* 2009;31:682-688.~~

32  
33  
34 ~~49. Brennan N, Mattick K. A systematic review of educational interventions to change  
35 behaviour of prescribers in hospital settings, with a particular emphasis on new prescribers.  
36 *Brit J Clin Pharmacol* 2013;75(2):359-372.~~
